# Supplementary material for: Inhibiting the reproduction of SARS-CoV-2 through perturbations in human lung cell metabolic network
Source: Life Sci Alliance. 2020 Nov 24;4(1):e202000869. doi: 10.26508/lsa.202000869 (PMC7723300; doi:10.26508/lsa.202000869)
Supplement: Supplementary file 1 [file LSA-2020-00869_TableS1.xlsx]

## Sheet: Sheet1
	Table S1. Results of the flux variability analysis, where flux range for each reaction is calculated while maintaining an optimal biomass flux to SARS-CoV-2 production. Results for simulations with minimal media (flux limits set to −10 or −1,000 mmol gDW−1 h−1) or rich media are shown. Reactions are ordered according to metabolic subsystems used in the RECON2.2 model, with associated genes identi…
	VIRUS FLUX VARIABILITY ANALYSIS
				min10			min1000			rich media
	rxnName	gene	subsystem	minimumVirus	maximumVirus		minimumVirus	maximumVirus		minimumVirus	maximumVirus
	ARGSL	HGNC:746	Alanine and aspartate metabolism	0.927249	0.927249		39.5562	39.5562		NA	NA
	ARGSS	HGNC:758	Alanine and aspartate metabolism	0.927249	0.927249		39.5562	39.5562		NA	NA
	ASNS1	HGNC:753	Alanine and aspartate metabolism	1.03321	1.03321		44.0767	44.0767		NA	NA
	ASPTA	HGNC:4432	Alanine and aspartate metabolism	-3.29766	-3.29766		NA	NA		NA	NA
	G5SADrm		Arginine and Proline Metabolism	0.7445	999.073		31.7602	960.444		NA	NA
	P5CRm	HGNC:9721	Arginine and Proline Metabolism	0.7445	1000		31.7602	1000		NA	NA
	NBAHH_ir	HGNC:20675, HGNC:24437	beta-Alanine metabolism	5.51081	5.51081		61.9195	61.9195		NA	NA
	BTNDe	HGNC:1122	Biotin metabolism	0.871433	0.871433		37.1751	37.1751		NA	NA
	CSm	HGNC:2422	Citric acid cycle	NA	NA		82.1235	82.1235		NA	NA
	FUMm	HGNC:3700	Citric acid cycle	NA	NA		181.958	1000		NA	NA
	MDH	HGNC:17836, HGNC:6970	Citric acid cycle	3.29766	3.29766		NA	NA		NA	NA
	MDHm	HGNC:6970, HGNC:6971	Citric acid cycle	NA	NA		82.1235	385.765		NA	NA
	SUCD1m	HGNC:10680, HGNC:10681, HGNC:10682, HGNC:10683	Citric acid cycle	NA	NA		183.244	183.244		NA	NA
	SUCOAS1m	HGNC:11449, HGNC:11450	Citric acid cycle	NA	NA		NA	NA		-1000	-1000
	SUCOASm	HGNC:11448, HGNC:11449	Citric acid cycle	NA	NA		NA	NA		-1000	-1000
	LAPCOAl	HGNC:123, HGNC:124, HGNC:125, HGNC:29609	CoA catabolism	0.376579	0.376579		165.068	165.068		NA	NA
	PNTEH	HGNC:12705, HGNC:12706, HGNC:16431	CoA catabolism	0.376579	0.376579		165.068	165.068		NA	NA
	r0578	HGNC:15894, HGNC:19365, HGNC:19366, HGNC:8598	CoA synthesis	-1000	-0.376579		-983.11	-165.068		NA	NA
	r0591	HGNC:3356, HGNC:3358	CoA synthesis	0.376579	0.376579		165.068	165.068		NA	NA
	DM_pmtcoa_LPAREN_r_RPAREN_		Exchange/demand reaction	NA	NA		82.1235	82.1235		NA	NA
	EX_3ivcrn_		Exchange/demand reaction	NA	NA		NA	NA		1000	1000
	EX_3mob_LPAREN_e_RPAREN_		Exchange/demand reaction	-10	-1.01555		-1000	-1000		NA	NA
	EX_3mop_LPAREN_e_RPAREN_		Exchange/demand reaction	-10	-1.15731		-78.4728	-78.4728		NA	NA
	EX_acald_LPAREN_e_RPAREN_		Exchange/demand reaction	NA	NA		851.864	851.864		NA	NA
	EX_ade_LPAREN_e_RPAREN_		Exchange/demand reaction	9.81175	9.81175		431.64	431.64		NA	NA
	EX_ahcys_LPAREN_e_RPAREN_		Exchange/demand reaction	-10	-10		-290.668	-290.668		NA	NA
	EX_ala_B_LPAREN_e_RPAREN_		Exchange/demand reaction	NA	NA		61.9195	61.9195		NA	NA
	EX_biocyt_LPAREN_e_RPAREN_		Exchange/demand reaction	-0.871433	-0.871433		-37.1751	-37.1751		NA	NA
	EX_carn_LPAREN_e_RPAREN_		Exchange/demand reaction	-5.51081	-5.51081		-61.9195	-61.9195		NA	NA
	EX_co2_LPAREN_e_RPAREN_		Exchange/demand reaction	24.0514	36.2121		1000	1000		NA	NA
	EX_crn_b		Exchange/demand reaction	NA	NA		NA	NA		-1000	-1000
	EX_glc_LPAREN_e_RPAREN_		Exchange/demand reaction	-10	-10		-1000	-1000		NA	NA
	EX_gln_L_b		Exchange/demand reaction	NA	NA		NA	NA		-1000	-119.092
	EX_glyphe_LPAREN_e_RPAREN_		Exchange/demand reaction	-10	-10		-427.444	-427.444		NA	NA
	EX_h_LPAREN_e_RPAREN_		Exchange/demand reaction	NA	NA		820.76	820.76		NA	NA
	EX_HC00229_LPAREN_e_RPAREN_		Exchange/demand reaction	NA	NA		277.833	277.833		NA	NA
	EX_hco3_LPAREN_e_RPAREN_		Exchange/demand reaction	NA	NA		298.435	298.435		NA	NA
	EX_hdcea_LPAREN_e_RPAREN_		Exchange/demand reaction	0.376579	0.376579		NA	NA		NA	NA
	EX_ile_L_LPAREN_e_RPAREN_		Exchange/demand reaction	NA	NA		29.1021	29.1021		NA	NA
	EX_leuleu_LPAREN_e_RPAREN_		Exchange/demand reaction	-0.965829	-0.965829		-41.2021	-41.2021		NA	NA
	EX_met_L_LPAREN_e_RPAREN_		Exchange/demand reaction	9.36317	9.36317		263.501	263.501		NA	NA
	EX_mthgxl_LPAREN_e_RPAREN_		Exchange/demand reaction	10.2947	27.0358		941.274	941.274		NA	NA
	EX_nh4_LPAREN_e_RPAREN_		Exchange/demand reaction	-10	-10		-968.986	-968.986		NA	NA
	EX_o2_LPAREN_e_RPAREN_		Exchange/demand reaction	-10	-10		-1000	-1000		NA	NA
	EX_ocdcea_LPAREN_e_RPAREN_		Exchange/demand reaction	NA	NA		NA	NA		-1000	-248.437
	EX_phe_L_LPAREN_e_RPAREN_		Exchange/demand reaction	8.41693	8.41693		359.911	359.911		NA	NA
	EX_pi_LPAREN_e_RPAREN_		Exchange/demand reaction	NA	NA		447.009	447.009		NA	NA
	EX_thr_L_LPAREN_e_RPAREN_		Exchange/demand reaction	-10	-10		-81.6668	-81.6668		-1000	-187.989
	EX_trp_L_LPAREN_e_RPAREN_		Exchange/demand reaction	-0.323659	-0.323659		-13.8072	-13.8072		-1000	-48.4425
	EX_utp_LPAREN_e_RPAREN_		Exchange/demand reaction	NA	NA		NA	NA		-1000	-292.233
	FACOAL161	HGNC:24174, HGNC:3569	Fatty acid oxidation	NA	NA		247.191	1000		NA	NA
	FAOXC5C5OHm		Fatty acid oxidation	NA	NA		NA	NA		1000	1000
	FAOXC5OHc	HGNC:18540, HGNC:2328, HGNC:2329	Fatty acid oxidation	NA	NA		NA	NA		1000	1000
	HIVCACBP	HGNC:2690	Fatty acid oxidation	NA	NA		NA	NA		1000	1000
	HIVCRNe		Fatty acid oxidation	NA	NA		NA	NA		1000	1000
	r0446		Fatty acid oxidation	0.376579	0.376579		82.1235	82.1235		NA	NA
	r1472	HGNC:88	Fatty acid oxidation	0.376579	0.376579		82.1235	82.1235		NA	NA
	r1474	HGNC:3151, HGNC:3247, HGNC:4801	Fatty acid oxidation	0.376579	0.376579		82.1235	82.1235		NA	NA
	r1477	HGNC:3247, HGNC:4799, HGNC:5213, HGNC:3247, HGNC:4800, HGNC:5213	Fatty acid oxidation	0.376579	0.376579		82.1235	82.1235		NA	NA
	r1481	HGNC:83, HGNC:4801, HGNC:4803	Fatty acid oxidation	0.376579	0.376579		82.1235	82.1235		NA	NA
	sink_octdececoa_LPAREN_c_RPAREN_		Fatty acid oxidation	-0.376579	-0.376579		-247.191	-247.191		NA	NA
	FTCD	HGNC:3974	Folate metabolism	5.21917	5.21917		49.4781	49.4781		NA	NA
	MTHFC	HGNC:7432	Folate metabolism	-6.56701	-6.56701		-299.191	-299.191		NA	NA
	MTHFCm	HGNC:21055, HGNC:7434	Folate metabolism	6.56701	6.56701		299.191	299.191		NA	NA
	GALK	HGNC:4118, HGNC:4119	Galactose metabolism	NA	NA		NA	NA		454.545	1000
	GALT	HGNC:4135	Galactose metabolism	NA	NA		NA	NA		1000	1000
	GALU	HGNC:12527, HGNC:12527	Galactose metabolism	NA	NA		NA	NA		1000	1000
	UDPG4E	HGNC:4116	Galactose metabolism	NA	NA		NA	NA		-1000	-454.545
	ABTArm	HGNC:23	Glutamate metabolism	-32.8683	-4.28463		-816.756	-816.756		NA	NA
	ALATA_L	HGNC:18062, HGNC:4552	Glutamate metabolism	NA	NA		-58.726	-58.726		NA	NA
	GLNS	HGNC:21016, HGNC:4341	Glutamate metabolism	2.39373	2.39373		102.116	102.116		NA	NA
	GLUDxm	HGNC:4335, HGNC:4336	Glutamate metabolism	NA	NA		-1000	-259.635		NA	NA
	GLUDym	HGNC:4335, HGNC:4336	Glutamate metabolism	NA	NA		-1000	-259.635		NA	NA
	r0178	HGNC:408	Glutamate metabolism	-1000	-4.28463		-1000	-816.756		NA	NA
	GHMT2r	HGNC:10850	Glycine, serine, alanine and threonine metabolism	-2.14336	-2.14336		-73.2383	-73.2383		NA	NA
	OBDHc		Glycine, serine, alanine and threonine metabolism	NA	NA		43.3233	43.3233		NA	NA
	r0160	HGNC:341	Glycine, serine, alanine and threonine metabolism	0.426564	964.588		NA	NA		NA	NA
	THRD_L	HGNC:10691, HGNC:30404	Glycine, serine, alanine and threonine metabolism	8.74399	8.74399		28.0858	28.0858		NA	NA
	ENO	HGNC:3350, HGNC:3354, HGNC:3354, HGNC:3353	Glycolysis/gluconeogenesis	35.8381	35.8381		1000	1000		1000	1000
	GAPD	HGNC:24864, HGNC:4141	Glycolysis/gluconeogenesis	35.8381	1000		1000	1000		1000	1000
	PGK	HGNC:8896, HGNC:8898	Glycolysis/gluconeogenesis	-1000	-35.8381		-1000	-1000		-1000	-1000
	PGM	HGNC:1093, HGNC:8888, HGNC:8889	Glycolysis/gluconeogenesis	-35.8381	-35.8381		-1000	-1000		-1000	-1000
	PGMT	HGNC:8905, HGNC:8906	Glycolysis/gluconeogenesis	NA	NA		NA	NA		-1000	-454.545
	TPI	HGNC:12009	Glycolysis/gluconeogenesis	16.1646	990.753		148.121	592.455		NA	NA
	HPYRRy	HGNC:4570	Glyoxylate and dicarboxylate metabolism	0.426564	964.588		NA	NA		NA	NA
	GluForTx	HGNC:3974	Histidine metabolism	5.21917	5.21917		49.4781	49.4781		NA	NA
	HISD	HGNC:4806	Histidine metabolism	5.21917	5.21917		49.4781	49.4781		NA	NA
	IZPN	HGNC:28577	Histidine metabolism	5.21917	5.21917		49.4781	49.4781		NA	NA
	URCN	HGNC:26444	Histidine metabolism	5.21917	5.21917		49.4781	49.4781		NA	NA
	AHC	HGNC:343, HGNC:344	Methionine and cysteine metabolism	10	10		290.668	290.668		NA	NA
	CYSTGL	HGNC:2501	Methionine and cysteine metabolism	0.357186	0.357186		15.2375	15.2375		NA	NA
	CYSTS	HGNC:1550	Methionine and cysteine metabolism	0.357186	0.357186		15.2375	15.2375		NA	NA
	METS	HGNC:7468	Methionine and cysteine metabolism	9.64281	9.64281		275.431	275.431		NA	NA
	H2CO3D	HGNC:1368, HGNC:1371, HGNC:1372, HGNC:1373, HGNC:1374, HGNC:1375, HGNC:1380, HGNC:1381, HGNC:1383, HGNC:14914	Miscellaneous	NA	NA		67.4188	1000		NA	NA
	NICRNS		NAD metabolism	0.56483	0.779312		NA	NA		NA	NA
	NP1	HGNC:7892	NAD metabolism	0.56483	0.779312		NA	NA		NA	NA
	r0391	HGNC:30450, HGNC:9755	NAD metabolism	0.56483	0.779312		NA	NA		NA	NA
	ADK1	HGNC:20091, HGNC:361, HGNC:362, HGNC:365	Nucleotide interconversion	NA	NA		NA	NA		-1000	-242.289
	ADK3	HGNC:365	Nucleotide interconversion	NA	NA		NA	NA		-1000	-242.289
	CTPS1	HGNC:2519, HGNC:2520	Nucleotide interconversion	0.214482	0.214482		9.14975	9.14975		NA	NA
	DURIPP	HGNC:23061, HGNC:7892	Nucleotide interconversion	NA	NA		701.742	701.742		NA	NA
	GK1	HGNC:4693	Nucleotide interconversion	NA	NA		9.14975	9.14975		NA	NA
	NTD6	HGNC:17144, HGNC:17818, HGNC:17820, HGNC:8021, HGNC:8022	Nucleotide interconversion	NA	NA		150.122	150.122		NA	NA
	PUNP1	HGNC:7892	Nucleotide interconversion	9.78552	10.0262		281.518	290.668		NA	NA
	PUNP7	HGNC:7892	Nucleotide interconversion	-1000	-0.188252		-1000	-9.14975		NA	NA
	r0394	HGNC:12805	Nucleotide interconversion	0.188252	0.214482		9.14975	9.14975		NA	NA
	r1384		Nucleotide interconversion	-1000	-0.214482		-1000	-9.14975		NA	NA
	RNDR1	HGNC:10451, HGNC:10452, HGNC:17296	Nucleotide interconversion	NA	NA		150.122	1000		NA	NA
	TRDR	HGNC:12437	Nucleotide interconversion	NA	NA		851.864	851.864		NA	NA
	URIDK2m	HGNC:3061	Nucleotide interconversion	NA	NA		-701.742	-701.742		NA	NA
	GUAPRT	HGNC:5157	Nucleotide salvage pathway	NA	NA		9.14975	9.14975		NA	NA
	ATPS4m	HGNC:13213, HGNC:14247, HGNC:18799, HGNC:8016, HGNC:823, HGNC:830, HGNC:833, HGNC:837, HGNC:838, HGNC:840, HGNC:842, HGNC:845, HGNC:846, HGNC:847, HGNC:848, HGNC:850, HGNC:14247, HGNC:8016, HGNC:823, HGNC:830, HGNC:833, HGNC:837, HGNC:838, HGNC:840, HGNC:841, HGNC:845, HGNC:846, HGNC:847, HGNC:848, HGNC:14247, HGNC:8016, HGNC:823, HGNC:830, HGNC:833, HGNC:837, HGNC:838, HGNC:840, HGNC:842, HGNC:8…	Oxidative phosphorylation	29.8006	41.9613		1000	1000		1000	1000
	CYOOm3	HGNC:16232, HGNC:2265, HGNC:2267, HGNC:2269, HGNC:2277, HGNC:2279, HGNC:2280, HGNC:2285, HGNC:2287, HGNC:2288, HGNC:2289, HGNC:2291, HGNC:2292, HGNC:2294, HGNC:24380, HGNC:24381, HGNC:24382, HGNC:7419, HGNC:7421, HGNC:7422	Oxidative phosphorylation	8.93068	8.93068		282.726	358.637		NA	NA
	CYOR_u10m	HGNC:12582, HGNC:12585, HGNC:12586, HGNC:12587, HGNC:12590, HGNC:2579, HGNC:29594, HGNC:30862, HGNC:30863, HGNC:7427	Oxidative phosphorylation	17.8614	17.8614		666.667	717.274		NA	NA
	NADH2_u10m	HGNC:17194, HGNC:20371, HGNC:20372, HGNC:23987, HGNC:30242, HGNC:7455, HGNC:7456, HGNC:7458, HGNC:7459, HGNC:7460, HGNC:7461, HGNC:7462, HGNC:7683, HGNC:7684, HGNC:7685, HGNC:7686, HGNC:7687, HGNC:7688, HGNC:7690, HGNC:7691, HGNC:7692, HGNC:7693, HGNC:7694, HGNC:7695, HGNC:7696, HGNC:7697, HGNC:7698, HGNC:7699, HGNC:7700, HGNC:7701, HGNC:7702, HGNC:7703, HGNC:7704, HGNC:7705, HGNC:7706, HGNC:7707…	Oxidative phosphorylation	3.00858	15.1693		NA	NA		NA	NA
	DRPA	HGNC:24269	Pentose phosphate pathway	NA	NA		851.864	851.864		1000	1000
	GLYPHEHYc		Pentose phosphate pathway	10	10		427.444	427.444		NA	NA
	PPM	HGNC:8905, HGNC:8906	Pentose phosphate pathway	9.24692	9.24692		-411.074	-411.074		1000	1000
	PRPPS	HGNC:9462, HGNC:9463, HGNC:9465	Pentose phosphate pathway	NA	NA		33.2453	33.2453		NA	NA
	r0570	HGNC:8906	Pentose phosphate pathway	NA	NA		851.864	851.864		1000	1000
	RPE	HGNC:10293	Pentose phosphate pathway	6.16461	6.16461		-296.213	-296.213		NA	NA
	TKT1	HGNC:11834, HGNC:11835, HGNC:25313	Pentose phosphate pathway	3.08231	3.08231		-148.106	-148.106		82.8125	736.436
	TKT2	HGNC:11834, HGNC:11835, HGNC:25313	Pentose phosphate pathway	3.08231	3.08231		-148.106	-148.106		82.8125	736.436
	PUNP2	HGNC:7892	Purine catabolism	NA	NA		140.972	150.122		NA	NA
	PUNP3	HGNC:7892	Purine catabolism	0.214482	1000		9.14975	1000		NA	NA
	r0853		Purine catabolism	NA	NA		701.742	701.742		NA	NA
	PYNP2r	HGNC:12576, HGNC:23061	Pyrimidine catabolism	NA	NA		-701.742	-701.742		NA	NA
	ASPCTr	HGNC:1424	Pyrimidine synthesis	0.56483	0.56483		24.0955	24.0955		NA	NA
	CBPS	HGNC:1424	Pyrimidine synthesis	0.56483	0.56483		24.0955	24.0955		NA	NA
	DHORD9	HGNC:2867	Pyrimidine synthesis	0.56483	0.56483		24.0955	24.0955		NA	NA
	DHORTS	HGNC:1424	Pyrimidine synthesis	-0.56483	-0.56483		-24.0955	-24.0955		NA	NA
	OMPDC	HGNC:12563	Pyrimidine synthesis	0.56483	0.56483		24.0955	24.0955		NA	NA
	ORPT	HGNC:12563	Pyrimidine synthesis	-0.56483	-0.56483		-24.0955	-24.0955		NA	NA
	RE1530C		Pyrimidine synthesis	NA	NA		-1000	-701.742		NA	NA
	r0055		Pyruvate metabolism	-1000	-10.2947		-1000	-941.274		NA	NA
	r0818		Pyruvate metabolism	NA	NA		701.742	701.742		NA	NA
	ARTFR12		R group synthesis	NA	NA		528.867	528.867		NA	NA
	ARTPLM3		R group synthesis	NA	NA		528.867	528.867		NA	NA
	GGNG	HGNC:4699, HGNC:4706, HGNC:4699, HGNC:4707, HGNC:4700, HGNC:4706, HGNC:4700, HGNC:4707	Starch and sucrose metabolism	NA	NA		NA	NA		181.818	181.818
	GLBRAN	HGNC:4180	Starch and sucrose metabolism	NA	NA		NA	NA		181.818	181.818
	GLGNS1	HGNC:4699, HGNC:4706, HGNC:4699, HGNC:4707, HGNC:4700, HGNC:4706, HGNC:4700, HGNC:4707	Starch and sucrose metabolism	NA	NA		NA	NA		181.818	181.818
	GLPASE1	HGNC:9723, HGNC:9725, HGNC:9726	Starch and sucrose metabolism	NA	NA		NA	NA		181.818	181.818
	GLPASE2	HGNC:9723, HGNC:9725, HGNC:9726	Starch and sucrose metabolism	NA	NA		NA	NA		181.818	181.818
	r0381		Taurine and hypotaurine metabolism	0.376579	0.376579		165.068	165.068		NA	NA
	r0539	HGNC:23506	Taurine and hypotaurine metabolism	0.376579	0.376579		165.068	165.068		NA	NA
	3MOBte		Transport, extracellular	1.01555	10		1000	1000		NA	NA
	3MOPte		Transport, extracellular	1.15731	10		78.4728	78.4728		NA	NA
	ACALDt		Transport, extracellular	NA	NA		-851.864	-851.864		NA	NA
	ADEt	HGNC:11004	Transport, extracellular	-9.81175	-9.81175		-431.64	-431.64		NA	NA
	AHCYSte		Transport, extracellular	10	10		290.668	290.668		NA	NA
	CARPEPT1tc	HGNC:10920	Transport, extracellular	5.51081	5.51081		61.9195	61.9195		NA	NA
	CO2t		Transport, extracellular	NA	NA		-1000	-67.4188		NA	NA
	GLYPHEPEPT1tc	HGNC:10920	Transport, extracellular	10	10		427.444	427.444		NA	NA
	HDCEAtr	HGNC:10996	Transport, extracellular	-0.376579	-0.376579		NA	NA		NA	NA
	LEULEULAPc	HGNC:18449	Transport, extracellular	0.965829	0.965829		41.2021	41.2021		NA	NA
	LEULEUPEPT1tc	HGNC:10920	Transport, extracellular	0.965829	0.965829		41.2021	41.2021		NA	NA
	MTHGXLt		Transport, extracellular	10.2947	27.0358		941.274	941.274		NA	NA
	O2t		Transport, extracellular	10	10		1000	1000		NA	NA
	PIt7	HGNC:10932, HGNC:10931, HGNC:10930, HGNC:10929, HGNC:11019, HGNC:11020	Transport, extracellular	NA	NA		NA	NA		-1000	-1000
	PIt8	HGNC:10946, HGNC:10947	Transport, extracellular	NA	NA		NA	NA		-1000	-1000
	PIt9	HGNC:20305	Transport, extracellular	NA	NA		NA	NA		-1000	-1000
	r0892		Transport, extracellular	NA	NA		NA	NA		-1000	-292.233
	r0899		Transport, extracellular	NA	NA		61.9195	1000		NA	NA
	r1423		Transport, extracellular	NA	NA		NA	NA		1000	1000
	COAtl		Transport, lysosomal	0.376579	0.376579		165.068	165.068		NA	NA
	DPCOAtl		Transport, lysosomal	0.376579	0.376579		165.068	165.068		NA	NA
	H2Otly		Transport, lysosomal	0.376579	0.376579		165.068	165.068		NA	NA
	r1150		Transport, lysosomal	0.376579	0.376579		165.068	165.068		NA	NA
	10FTHFtm		Transport, mitochondrial	-6.56701	-6.56701		-299.191	-299.191		NA	NA
	3MOBt2im		Transport, mitochondrial	NA	NA		756.062	1000		NA	NA
	3MOPt2im		Transport, mitochondrial	NA	NA		756.062	1000		NA	NA
	4ABUTtm		Transport, mitochondrial	-32.8683	-4.28463		-816.756	-816.756		NA	NA
	4MOPt2im		Transport, mitochondrial	NA	NA		756.062	1000		NA	NA
	ATPtm	HGNC:10990, HGNC:10991, HGNC:10992	Transport, mitochondrial	NA	NA		1000	1000		NA	NA
	CITRtm	HGNC:22921, HGNC:10985	Transport, mitochondrial	NA	NA		39.5562	1000		NA	NA
	CO2tm		Transport, mitochondrial	NA	NA		-1000	-1000		NA	NA
	DNDPt19m	HGNC:14409	Transport, mitochondrial	NA	NA		701.742	701.742		NA	NA
	GLUt2m	HGNC:10982, HGNC:10983, HGNC:10988, HGNC:19954	Transport, mitochondrial	NA	NA		467.378	467.378		NA	NA
	GLYtm		Transport, mitochondrial	6.56701	6.56701		299.191	299.191		NA	NA
	H2Otm	HGNC:642	Transport, mitochondrial	NA	NA		-1000	-181.958		NA	NA
	ILEt5m		Transport, mitochondrial	NA	NA		-1000	-756.062		NA	NA
	L_LACtcm	HGNC:643	Transport, mitochondrial	NA	NA		1000	1000		NA	NA
	L_LACtm	HGNC:10922	Transport, mitochondrial	NA	NA		-1000	-1000		NA	NA
	LEUt5m		Transport, mitochondrial	NA	NA		-1000	-756.062		NA	NA
	O2tm		Transport, mitochondrial	8.93068	8.93068		358.637	358.637		NA	NA
	PIt2m	HGNC:10989	Transport, mitochondrial	NA	NA		1000	1000		NA	NA
	PROtm		Transport, mitochondrial	NA	NA		968.24	968.24		NA	NA
	r0801	HGNC:10992	Transport, mitochondrial	NA	NA		-1000	-1000		NA	NA
	r0838		Transport, mitochondrial	26.9313	26.9313		1000	1000		NA	NA
	r0911		Transport, mitochondrial	NA	NA		-1000	-1000		NA	NA
	r1001		Transport, mitochondrial	0.376579	1000		82.1235	1000		NA	NA
	CK	HGNC:1995, HGNC:1996, HGNC:31736	Urea cycle	NA	NA		134.972	579.307		NA	NA
	CKc	HGNC:1991, HGNC:1994, HGNC:1991, HGNC:1994	Urea cycle	NA	NA		-579.307	-134.972		NA	NA
	CREATtmdiffir		Urea cycle	NA	NA		134.972	579.307		NA	NA
	OCBTm	HGNC:8512	Urea cycle	0.927249	0.927249		39.5562	39.5562		NA	NA
	ORNTArm	HGNC:8091	Urea cycle	-0.927249	-0.927249		-39.5562	-39.5562		NA	NA
	PCREATtmdiffir		Urea cycle	NA	NA		134.972	579.307		NA	NA
	r0074	HGNC:406	Urea cycle	-1000	-1.67175		-1000	-71.3164		NA	NA
	ACOAD9m	HGNC:87, HGNC:89	Valine, leucine, and isoleucine metabolism	NA	NA		263.499	956.677		NA	NA
	HIBDm	HGNC:4907	Valine, leucine, and isoleucine metabolism	NA	NA		956.677	956.677		NA	NA
	ILETA	HGNC:976	Valine, leucine, and isoleucine metabolism	NA	NA		677.589	921.527		NA	NA
	ILETAm	HGNC:977	Valine, leucine, and isoleucine metabolism	NA	NA		-1000	-756.062		NA	NA
	LEUTA	HGNC:976	Valine, leucine, and isoleucine metabolism	NA	NA		756.062	1000		NA	NA
	LEUTAm	HGNC:977	Valine, leucine, and isoleucine metabolism	NA	NA		-1000	-756.062		NA	NA
	MCCCrm	HGNC:6936, HGNC:6937	Valine, leucine, and isoleucine metabolism	NA	NA		NA	NA		-1000	-1000
	MGCHrm	HGNC:890	Valine, leucine, and isoleucine metabolism	NA	NA		NA	NA		-1000	-1000
	MMMm	HGNC:7526	Valine, leucine, and isoleucine metabolism	9.10118	18.0856		1000	1000		NA	NA
	PPCOACm	HGNC:8653, HGNC:8654	Valine, leucine, and isoleucine metabolism	9.10118	9.10118		43.3233	43.3233		NA	NA
	GU28_prodrxn_VN		Virus biomass reaction	2.88928	2.88928		123.256	123.256		432.443	432.443
	r0392	HGNC:403, HGNC:404, HGNC:407, HGNC:412, HGNC:877		-964.588	-0.426564		NA	NA		NA	NA
	EX_3ivcrn_b			NA	NA		NA	NA		1000	1000
	EX_3mob_b			-10	-1.01555		-1000	-1000		NA	NA
	EX_3mop_b			-10	-1.15731		-78.4728	-78.4728		NA	NA
	EX_4abut_b			4.28463	32.8683		816.756	816.756		NA	NA
	EX_acald_b			NA	NA		851.864	851.864		NA	NA
	EX_ade_b			9.81175	9.81175		431.64	431.64		NA	NA
	EX_ahcys_b			-10	-10		-290.668	-290.668		NA	NA
	EX_ala_B_b			NA	NA		61.9195	61.9195		NA	NA
	EX_biocyt_b			-0.871433	-0.871433		-37.1751	-37.1751		NA	NA
	EX_btn_b			0.871433	0.871433		37.1751	37.1751		NA	NA
	EX_carn_b			-5.51081	-5.51081		-61.9195	-61.9195		NA	NA
	EX_co2_b			24.0514	36.2121		1000	1000		NA	NA
	EX_crn_LPAREN_e_RPAREN_			NA	NA		NA	NA		-1000	-1000
	EX_glc_D_b			-10	-10		-1000	-1000		NA	NA
	EX_gln_L_LPAREN_e_RPAREN_			NA	NA		NA	NA		-1000	-119.092
	EX_glyphe_b			-10	-10		-427.444	-427.444		NA	NA
	EX_h_b			NA	NA		820.76	820.76		NA	NA
	EX_HC00229_b			NA	NA		277.833	277.833		NA	NA
	EX_HC02191_b			NA	NA		NA	NA		248.437	1000
	EX_HC02191_LPAREN_e_RPAREN_			NA	NA		NA	NA		248.437	1000
	EX_hco3_b			NA	NA		298.435	298.435		NA	NA
	EX_hdcea_b			0.376579	0.376579		NA	NA		NA	NA
	EX_ile_L_b			NA	NA		29.1021	29.1021		NA	NA
	EX_leuleu_b			-0.965829	-0.965829		-41.2021	-41.2021		NA	NA
	EX_met_L_b			9.36317	9.36317		263.501	263.501		NA	NA
	EX_mthgxl_b			10.2947	27.0358		941.274	941.274		NA	NA
	EX_nh4_b			-10	-10		-968.986	-968.986		NA	NA
	EX_o2_b			-10	-10		-1000	-1000		NA	NA
	EX_ocdcea_b			NA	NA		NA	NA		-1000	-248.437
	EX_octdececoa_b			-0.376579	-0.376579		-247.191	-247.191		NA	NA
	EX_phe_L_b			8.41693	8.41693		359.911	359.911		NA	NA
	EX_pi_b			NA	NA		447.009	447.009		NA	NA
	EX_pmtcoa_b			NA	NA		82.1235	82.1235		NA	NA
	EX_pnto_R_b			0.376579	0.376579		165.068	165.068		NA	NA
	EX_taur_b			0.376579	0.376579		165.068	165.068		NA	NA
	EX_thr_L_b			-10	-10		-81.6668	-81.6668		-1000	-187.989
	EX_trp_L_b			-0.323659	-0.323659		-13.8072	-13.8072		-1000	-48.4425
	EX_utp_b			NA	NA		NA	NA		-1000	-292.233
	r0390	HGNC:10856		NA	NA		-277.833	-277.833		NA	NA
	r0510	HGNC:10571, HGNC:21088		NA	NA		165.068	446.743		NA	NA
	r0511	HGNC:10571, HGNC:21088		NA	NA		-446.743	-165.068		NA	NA
	RE3245C			NA	NA		NA	NA		-1000	-248.437
