# Supplementary material for: Inhibiting the reproduction of SARS-CoV-2 through perturbations in human lung cell metabolic network
Source: Life Sci Alliance. 2020 Nov 24;4(1):e202000869. doi: 10.26508/lsa.202000869 (PMC7723300; doi:10.26508/lsa.202000869)
Supplement: Supplementary file 2 [file LSA-2020-00869_TableS2.xlsx]

## Sheet: Sheet1
	Table S2. Results of the single and combined reaction perturbations (gene knock-out simulations) on SARS-CoV-2 production, as performed on all reactions identified as flux-carrying in the flux variability analysis. Simulation results with the minimal media with two different uptake flux limits are shown (flux limits set to −10 or −1,000 mmol gDW−1 h−1). Effects of knock-outs are shown as percenta…
	SINGLE KO EFFECTS ON VIRUS OPTIMA							DOUBLE KO EFFECTS ON VIRUS OPTIMA
				min10		min1000		min10_doubleKO_virusOptimaBelow80%				min1000_doubleKO_virusOptimaBelow80%
	rxnName	gene	subsystem	virus_optima_KO		virus_optima_KO		rxnAname	rxnBname	doubleKOoptimaVirus		rxnAname	rxnBname	doubleKOoptimaVirus
	3MOBte		Transport, extracellular	0		0		GAPD	CYOR_u10m	25.6836		CSm	FTCD	0
	3MOPte		Transport, extracellular	0		0		GAPD	O2t	27.6063		CSm	GluForTx	0
	AHC	HGNC:343, HGNC:344	Methionine and cysteine metabolism	0		0		PGK	CYOR_u10m	28.3328		CSm	HISD	0
	AHCYSte		Transport, extracellular	0		0		ENO	CYOR_u10m	29.21		CSm	IZPN	0
	ARGSL	HGNC:746	Alanine and aspartate metabolism	0		0		PGM	CYOR_u10m	30.2201		CSm	URCN	0
	ARGSS	HGNC:758	Alanine and aspartate metabolism	0		0		PGK	O2t	30.5172		GK1	PUNP3	0
	ASNS1	HGNC:753	Alanine and aspartate metabolism	0		0		ENO	O2t	30.6472		ILETA	3MOPt2im	0
	ASPCTr	HGNC:1424	Pyrimidine synthesis	0		0		PGM	O2t	32.0082		ILETA	ILEt5m	0
	ATPS4m	HGNC:13213, HGNC:14247, HGNC:18799, HGNC:8016, HGNC:823, HGNC:830, HGNC:833, HGNC:837, HGNC:838, HGNC:840, HGNC:842, HGNC:845, HGNC:846, HGNC:847, HGNC:848, HGNC:850, HGNC:14247, HGNC:8016, HGNC:823, HGNC:830, HGNC:833, HGNC:837, HGNC:838, HGNC:840, HGNC:841, HGNC:845, HGNC:846, HGNC:847, HGNC:848, HGNC:14247, HGNC:8016, HGNC:823, HGNC:830, HGNC:833, HGNC:837, HGNC:838, HGNC:840, HGNC:842, HGNC:8…	Oxidative phosphorylation	75.2127		74.5999		GAPD	ATPS4m	32.595		ILETA	ILETAm	0
	BTNDe	HGNC:1122	Biotin metabolism	0		0		PGK	ATPS4m	34.2066		PROtm	r0911	0
	CARPEPT1tc	HGNC:10920	Transport, extracellular	0		0		ENO	ATPS4m	37.3146		CYOR_u10m	O2t	29.6502
	CBPS	HGNC:1424	Pyrimidine synthesis	0		0		PGM	ATPS4m	37.3146		GAPD	O2t	31.3089
	COAtl		Transport, lysosomal	0		0		METS	CYOR_u10m	37.9389		PGK	O2t	34.777
	CYOR_u10m	HGNC:12582, HGNC:12585, HGNC:12586, HGNC:12587, HGNC:12590, HGNC:2579, HGNC:29594, HGNC:30862, HGNC:30863, HGNC:7427	Oxidative phosphorylation	60.5042		62.2614		GAPD	O2tm	43.507		ENO	O2t	35.1477
	CYSTGL	HGNC:2501	Methionine and cysteine metabolism	0		0		TPI	CYOR_u10m	43.9585		ATPS4m	O2t	39.0815
	CYSTS	HGNC:1550	Methionine and cysteine metabolism	0		0		CYOR_u10m	O2t	44.3823		GAPD	CYOR_u10m	40.1333
	DHORD9	HGNC:2867	Pyrimidine synthesis	0		0		ENO	O2tm	46.3033		METS	CYOR_u10m	41.6168
	DHORTS	HGNC:1424	Pyrimidine synthesis	0		0		PGK	O2tm	46.31		r0074	O2t	41.6937
	DPCOAtl		Transport, lysosomal	0		0		PGM	O2tm	47.8072		PGM	O2t	42.1975
	ENO	HGNC:3350, HGNC:3354, HGNC:3354, HGNC:3353	Glycolysis/gluconeogenesis	65.285		75.7243		TPI	O2t	48.6243		PGK	CYOR_u10m	43.0533
	G5SADrm		Arginine and Proline Metabolism	0		0		GAPD	METS	50.915		GAPD	ATPS4m	43.5778
	GAPD	HGNC:24864, HGNC:4141	Glycolysis/gluconeogenesis	62.6583		68.5553		METS	PGK	52.7115		ENO	CYOR_u10m	46.0612
	GLNS	HGNC:21016, HGNC:4341	Glutamate metabolism	0		0		PPM	CYOR_u10m	52.8481		CSm	O2t	47.4136
	GLYPHEHYc		Pentose phosphate pathway	0		0		RPE	CYOR_u10m	52.8481		PGK	ATPS4m	48.3224
	GLYPHEPEPT1tc	HGNC:10920	Transport, extracellular	0		0		TKT1	CYOR_u10m	52.8481		PGM	CYOR_u10m	48.8081
	HIBDm	HGNC:4907	Valine, leucine, and isoleucine metabolism	NA		88.4369		TKT2	CYOR_u10m	52.8481		METS	O2t	49.754
	LAPCOAl	HGNC:123, HGNC:124, HGNC:125, HGNC:29609	CoA catabolism	0		0		METS	O2t	53.1162		ENO	ATPS4m	51.0365
	LEULEULAPc	HGNC:18449	Transport, extracellular	0		0		CYOR_u10m	MTHGXLt	53.2974		O2t	r0838	51.1016
	LEULEUPEPT1tc	HGNC:10920	Transport, extracellular	0		0		r0055	CYOR_u10m	53.2974		O2t	CYOOm3	51.1095
	METS	HGNC:7468	Methionine and cysteine metabolism	81.848		NA		GAPD	CYOOm3	53.3686		MMMm	O2t	53.4844
	MMMm	HGNC:7526	Valine, leucine, and isoleucine metabolism	NA		86.998		ATPS4m	O2t	54.7716		TPI	O2t	55.0051
	NBAHH_ir	HGNC:20675, HGNC:24437	beta-Alanine metabolism	0		0		TPI	ATPS4m	54.8233		MMMm	CYOR_u10m	55.8432
	O2t		Transport, extracellular	66.2129		58.0026		ENO	METS	55.3106		r0390	O2t	56.1228
	O2tm		Transport, mitochondrial	82.8903		NA		CYOR_u10m	r0838	55.4637		ACOAD9m	CYOR_u10m	56.5377
	OCBTm	HGNC:8512	Urea cycle	0		0		r0074	O2t	55.6611		HIBDm	CYOR_u10m	56.5377
	OMPDC	HGNC:12563	Pyrimidine synthesis	0		0		PGK	CYOOm3	55.7143		GAPD	MMMm	56.7229
	ORNTArm	HGNC:8091	Urea cycle	0		0		GAPD	PPM	55.811		PGM	ATPS4m	56.7672
	ORPT	HGNC:12563	Pyrimidine synthesis	0		0		ENO	CYOOm3	55.9809		FTCD	O2t	56.8642
	P5CRm	HGNC:9721	Arginine and Proline Metabolism	0		0		METS	PGM	56.0764		IZPN	O2t	56.8642
	PGK	HGNC:8896, HGNC:8898	Glycolysis/gluconeogenesis	64.972		73.6031		O2t	r0838	56.1146		GluForTx	O2t	56.8642
	PGM	HGNC:1093, HGNC:8888, HGNC:8889	Glycolysis/gluconeogenesis	66.6562		80.7684		10FTHFtm	CYOR_u10m	57.0875		HISD	O2t	56.8642
	PNTEH	HGNC:12705, HGNC:12706, HGNC:16431	CoA catabolism	0		0		MTHFC	CYOR_u10m	57.0875		URCN	O2t	56.8642
	r0539	HGNC:23506	Taurine and hypotaurine metabolism	0		0		MTHFCm	CYOR_u10m	57.0875		LEUTA	O2t	57.1779
	r0591	HGNC:3356, HGNC:3358	CoA synthesis	0		0		CYOR_u10m	GLYtm	57.0875		GAPD	HIBDm	57.2738
	r1150		Transport, lysosomal	0		0		GAPD	TPI	57.1947		ALATA_L	O2t	57.4061
	sink_octdececoa_LPAREN_c_RPAREN_		Fatty acid oxidation	0		0		MMMm	CYOR_u10m	57.2243		SUCD1m	O2t	57.5167
	TPI	HGNC:12009	Glycolysis/gluconeogenesis	82.5278		NA		PGM	CYOOm3	57.364		r0381	O2t	57.5967
								ADEt	CYOR_u10m	58.0537		r0570	O2t	57.6272
								PUNP1	CYOR_u10m	58.0912		DRPA	O2t	57.6272
								FTCD	PGK	58.1522		TRDR	O2t	57.6272
								FTCD	GAPD	58.1522		DURIPP	O2t	57.6278
								GAPD	HISD	58.1522		O2t	r0818	57.6278
								GAPD	IZPN	58.1522		PYNP2r	O2t	57.6278
								GAPD	URCN	58.1522		RE1530C	O2t	57.6278
								GluForTx	PGK	58.1522		URIDK2m	O2t	57.6278
								HISD	PGK	58.1522		O2t	r0853	57.6321
								IZPN	PGK	58.1522		MTHGXLt	O2t	57.6475
								GAPD	GluForTx	58.1522		r0055	O2t	57.6475
								PGK	URCN	58.1522		O2t	r1001	57.6917
								r0578	CYOR_u10m	58.2707		r1481	O2t	57.6917
								r0381	CYOR_u10m	58.2955		r0446	O2t	57.6917
								r0178	CYOR_u10m	58.661		r1472	O2t	57.6917
								4ABUTtm	CYOR_u10m	58.661		r1474	O2t	57.6917
								ABTArm	CYOR_u10m	58.661		r1477	O2t	57.6917
								CYOR_u10m	H2Otly	58.8401		MDHm	O2t	57.7011
								PPCOACm	CYOR_u10m	58.8469		ADEt	O2t	57.757
								THRD_L	CYOR_u10m	58.9295		PUNP1	O2t	57.758
								RPE	O2t	58.9988		GHMT2r	O2t	57.7686
								TKT2	O2t	58.9988		r1384	O2t	57.7721
								TKT1	O2t	58.9988		PUNP3	O2t	57.7721
								PPM	O2t	58.9988		TKT2	O2t	57.7746
								FTCD	O2t	59.0492		RPE	O2t	57.7746
								URCN	O2t	59.0492		TKT1	O2t	57.7746
								GluForTx	O2t	59.0492		PPM	O2t	57.7746
								HISD	O2t	59.0492		r0578	O2t	57.787
								IZPN	O2t	59.0492		H2Otly	O2t	57.7989
								ATPS4m	MTHGXLt	59.092		HIBDm	O2t	57.8428
								r0055	ATPS4m	59.092		CTPS1	O2t	57.8796
								ENO	GluForTx	59.4092		PUNP7	O2t	57.8946
								ENO	FTCD	59.4092		r0394	O2t	57.8946
								ENO	HISD	59.4092		GLYtm	O2t	57.9119
								ENO	URCN	59.4092		MTHFC	O2t	57.9119
								FTCD	PGM	59.4092		10FTHFtm	O2t	57.9119
								HISD	PGM	59.4092		MTHFCm	O2t	57.9119
								IZPN	PGM	59.4092		PPCOACm	O2t	57.9375
								PGM	URCN	59.4092		O2t	PCREATtmdiffir	58.0026
								ENO	IZPN	59.4092		ACOAD9m	O2t	58.0026
								GluForTx	PGM	59.4092		4ABUTtm	O2t	58.0026
								CYOR_u10m	O2tm	59.6967		3MOBt2im	O2t	58.0026
								r0074	CYOR_u10m	59.7146		ACALDt	O2t	58.0026
								GAPD	r0838	60.0383		ARTPLM3	O2t	58.0026
								MDH	CYOR_u10m	60.0644		ATPtm	O2t	58.0026
								ASPTA	CYOR_u10m	60.0644		CITRtm	O2t	58.0026
								NICRNS	CYOR_u10m	60.2351		CKc	O2t	58.0026
								NP1	CYOR_u10m	60.2351		DNDPt19m	O2t	58.0026
								r0391	CYOR_u10m	60.2351		FACOAL161	O2t	58.0026
								FTCD	CYOR_u10m	60.2681		GK1	O2t	58.0026
								GluForTx	CYOR_u10m	60.2681		GLUt2m	O2t	58.0026
								HISD	CYOR_u10m	60.2681		H2CO3D	O2t	58.0026
								IZPN	CYOR_u10m	60.2681		ILEt5m	O2t	58.0026
								URCN	CYOR_u10m	60.2681		ILETA	O2t	58.0026
								PUNP3	CYOR_u10m	60.4017		ILETAm	O2t	58.0026
								r1384	CYOR_u10m	60.4017		L_LACtcm	O2t	58.0026
								CTPS1	CYOR_u10m	60.4017		L_LACtm	O2t	58.0026
								GHMT2r	CYOR_u10m	60.4883		LEUTAm	O2t	58.0026
								CYOR_u10m	HDCEAtr	60.5042		O2t	DM_pmtcoa_LPAREN_r_RPAREN_	58.0026
								CYOR_u10m	r1001	60.5042		O2t	O2tm	58.0026
								r0392	CYOR_u10m	60.5042		O2t	PIt2m	58.0026
								r1472	CYOR_u10m	60.5042		O2t	PROtm	58.0026
								r1481	CYOR_u10m	60.5042		r0178	O2t	58.0026
								ATPS4m	CYOR_u10m	60.5042		r0510	O2t	58.0026
								CYOR_u10m	CYOOm3	60.5042		ABTArm	O2t	58.0026
								CYOR_u10m	NADH2_u10m	60.5042		CREATtmdiffir	O2t	58.0026
								HPYRRy	CYOR_u10m	60.5042		FUMm	O2t	58.0026
								PUNP7	CYOR_u10m	60.5042		GLUDxm	O2t	58.0026
								r0160	CYOR_u10m	60.5042		GLUDym	O2t	58.0026
								r0394	CYOR_u10m	60.5042		H2Otm	O2t	58.0026
								r0446	CYOR_u10m	60.5042		LEUt5m	O2t	58.0026
								r1474	CYOR_u10m	60.5042		O2t	r0801	58.0026
								r1477	CYOR_u10m	60.5042		O2t	r0899	58.0026
								ENO	GAPD	60.5261		O2t	r0911	58.0026
								ENO	PGK	60.5261		OBDHc	O2t	58.0026
								GAPD	GLYtm	60.576		PUNP2	O2t	58.0026
								GAPD	MTHFCm	60.576		RNDR1	O2t	58.0026
								GAPD	10FTHFtm	60.576		THRD_L	O2t	58.0026
								GAPD	MTHFC	60.576		3MOPt2im	O2t	58.0026
								GAPD	NADH2_u10m	61.1556		4MOPt2im	O2t	58.0026
								GAPD	ADEt	61.3933		ARTFR12	O2t	58.0026
								GAPD	PUNP1	61.3956		CK	O2t	58.0026
								ENO	r0838	61.4925		CO2t	O2t	58.0026
								GAPD	PPCOACm	61.619		NTD6	O2t	58.0026
								GAPD	MMMm	61.619		PRPPS	O2t	58.0026
								GAPD	r0074	61.643		r0511	O2t	58.0026
								GAPD	THRD_L	61.6498		CO2tm	O2t	58.0026
								PGK	NADH2_u10m	61.8508		GUAPRT	O2t	58.0026
								O2t	CYOOm3	62.0264		CYOR_u10m	r0838	58.1009
								GAPD	r0381	62.087		TPI	CYOR_u10m	58.6054
								GAPD	RPE	62.1109		r0055	CYOR_u10m	58.7456
								GAPD	TKT2	62.1109		CYOR_u10m	MTHGXLt	58.7456
								GAPD	TKT1	62.1109		4ABUTtm	CYOR_u10m	59.3163
								GAPD	H2Otly	62.1525		ABTArm	CYOR_u10m	59.3163
								ABTArm	GAPD	62.168		r0178	CYOR_u10m	59.3163
								GAPD	r0178	62.168		r0578	CYOR_u10m	59.4776
								GAPD	4ABUTtm	62.168		CYOR_u10m	O2tm	59.6055
								GAPD	GHMT2r	62.1745		r0381	CYOR_u10m	60.1101
								GAPD	PGM	62.2642		MMMm	PGK	60.594
								PGK	PGM	62.2642		DRPA	CYOR_u10m	60.6582
								GAPD	NICRNS	62.3115		ACALDt	CYOR_u10m	60.6582
								GAPD	NP1	62.3115		r0570	CYOR_u10m	60.6582
								GAPD	r0391	62.3115		TRDR	CYOR_u10m	60.6582
								GAPD	PUNP3	62.4107		GAPD	r0838	60.755
								GAPD	r1384	62.4107		CYOR_u10m	H2Otly	60.9965
								GAPD	r0578	62.4267		DURIPP	CYOR_u10m	60.998
								GAPD	r1472	62.4267		PYNP2r	CYOR_u10m	60.998
								GAPD	r0446	62.4267		RE1530C	CYOR_u10m	60.998
								GAPD	r1474	62.4267		URIDK2m	CYOR_u10m	60.998
								GAPD	r1477	62.4267		CYOR_u10m	r0818	60.998
								GAPD	r1481	62.4267		r1474	CYOR_u10m	61.0033
								GAPD	r1001	62.4267		r1472	CYOR_u10m	61.0033
								GAPD	MDH	62.4959		r1477	CYOR_u10m	61.0033
								ASPTA	GAPD	62.4959		r1481	CYOR_u10m	61.0033
								CTPS1	GAPD	62.5262		CYOR_u10m	r1001	61.0033
								GAPD	r0394	62.5423		r0446	CYOR_u10m	61.0033
								GAPD	PUNP7	62.5423		CYOR_u10m	r0853	61.0106
								PGK	r0838	62.5808		GAPD	TRDR	61.0307
								GAPD	HDCEAtr	62.6443		MMMm	ATPS4m	61.1345
								GAPD	PGK	62.6583		r0390	CYOR_u10m	61.2051
								GAPD	r0160	62.6583		PPM	CYOR_u10m	61.2387
								GAPD	HPYRRy	62.6583		RPE	CYOR_u10m	61.2387
								GAPD	MTHGXLt	62.6583		TKT1	CYOR_u10m	61.2387
								GAPD	r0055	62.6583		TKT2	CYOR_u10m	61.2387
								GAPD	r0392	62.6583		DRPA	GAPD	61.2931
								PGK	10FTHFtm	63.0356		GAPD	r0570	61.2931
								MTHFCm	PGK	63.0356		ARTPLM3	CYOR_u10m	61.3265
								MTHFC	PGK	63.0356		ARTFR12	CYOR_u10m	61.3265
								PGK	GLYtm	63.0356		r0511	CYOR_u10m	61.3265
								PGK	TPI	63.7837		r0510	CYOR_u10m	61.3265
								10FTHFtm	O2t	63.8837		ATPS4m	CYOR_u10m	61.4255
								GLYtm	O2t	63.8837		CYOR_u10m	CYOOm3	61.4255
								MTHFC	O2t	63.8837		r0074	CYOR_u10m	61.4388
								MTHFCm	O2t	63.8837		GluForTx	CYOR_u10m	61.5159
								PGK	r0074	63.9201		IZPN	CYOR_u10m	61.5159
								PGK	ADEt	63.9995		FTCD	CYOR_u10m	61.5159
								PGK	PUNP1	64.0011		HISD	CYOR_u10m	61.5159
								ENO	ADEt	64.0234		URCN	CYOR_u10m	61.5159
								ENO	PUNP1	64.0255		ALATA_L	CYOR_u10m	61.635
								PGK	PPM	64.0351		FACOAL161	CYOR_u10m	61.6472
								PGK	TKT1	64.0351		ADEt	CYOR_u10m	61.729
								PGK	TKT2	64.0351		HIBDm	PGK	61.7503
								PGK	RPE	64.0351		SUCD1m	CYOR_u10m	61.887
								MMMm	PGK	64.0443		CYOR_u10m	DM_pmtcoa_LPAREN_r_RPAREN_	62.0525
								PGK	PPCOACm	64.0443		GAPD	PYNP2r	62.0816
								PGK	THRD_L	64.0668		GAPD	r0818	62.0816
								PGK	MTHGXLt	64.0799		GAPD	RE1530C	62.0816
								PGK	r0055	64.0799		GAPD	URIDK2m	62.0816
								ENO	r0074	64.2224		DURIPP	GAPD	62.0816
								PGM	r0838	64.2703		GHMT2r	CYOR_u10m	62.0914
								METS	ATPS4m	64.3475		CO2tm	CYOR_u10m	62.144
								ABTArm	PGK	64.3597		CYOR_u10m	L_LACtcm	62.144
								PGK	4ABUTtm	64.3597		CYOR_u10m	L_LACtm	62.144
								PGK	r0178	64.3597		HIBDm	ATPS4m	62.152
								PGK	r0381	64.3754		CTPS1	CYOR_u10m	62.1547
								PGK	H2Otly	64.4464		PUNP3	CYOR_u10m	62.1547
								TPI	O2tm	64.4477		r1384	CYOR_u10m	62.1547
								ENO	MMMm	64.5332		PUNP1	CYOR_u10m	62.1689
								ENO	PPCOACm	64.5332		10FTHFtm	CYOR_u10m	62.2061
								GHMT2r	PGK	64.5358		CYOR_u10m	GLYtm	62.2061
								ENO	THRD_L	64.5516		MTHFC	CYOR_u10m	62.2061
								NICRNS	PGK	64.6128		MTHFCm	CYOR_u10m	62.2061
								NP1	PGK	64.6128		PPCOACm	CYOR_u10m	62.2299
								PGK	r0391	64.6128		GLUDym	CYOR_u10m	62.2451
								ENO	r0381	64.6939		GLUDxm	CYOR_u10m	62.2451
								PGK	r1384	64.7155		CYOR_u10m	r0801	62.2547
								PGK	PUNP3	64.7155		ATPtm	CYOR_u10m	62.2547
								PGK	r1474	64.7321		3MOPt2im	CYOR_u10m	62.2614
								PGK	r1481	64.7321		4MOPt2im	CYOR_u10m	62.2614
								PGK	r0578	64.7321		3MOBt2im	CYOR_u10m	62.2614
								PGK	r1001	64.7321		CITRtm	CYOR_u10m	62.2614
								PGK	r1472	64.7321		CK	CYOR_u10m	62.2614
								PGK	r1477	64.7321		CKc	CYOR_u10m	62.2614
								PGK	r0446	64.7321		CO2t	CYOR_u10m	62.2614
								ABTArm	ENO	64.7505		CSm	CYOR_u10m	62.2614
								ENO	4ABUTtm	64.7505		CYOR_u10m	GLUt2m	62.2614
								ENO	r0178	64.7505		CYOR_u10m	H2Otm	62.2614
								ASPTA	PGK	64.7618		CYOR_u10m	ILEt5m	62.2614
								MDH	PGK	64.7618		CYOR_u10m	LEUt5m	62.2614
								ENO	H2Otly	64.764		CYOR_u10m	PCREATtmdiffir	62.2614
								CTPS1	PGK	64.8351		CYOR_u10m	PIt2m	62.2614
								PGK	r0394	64.8519		CYOR_u10m	PROtm	62.2614
								PGK	PUNP7	64.8519		CYOR_u10m	r0899	62.2614
								ENO	NADH2_u10m	64.8719		CYOR_u10m	r0911	62.2614
								ENO	NP1	64.9221		FUMm	CYOR_u10m	62.2614
								ENO	r0391	64.9221		GK1	CYOR_u10m	62.2614
								ENO	NICRNS	64.9221		GUAPRT	CYOR_u10m	62.2614
								PGK	HDCEAtr	64.952		ILETA	CYOR_u10m	62.2614
								HPYRRy	PGK	64.972		ILETAm	CYOR_u10m	62.2614
								PGK	r0160	64.972		LEUTA	CYOR_u10m	62.2614
								PGK	r0392	64.972		MDHm	CYOR_u10m	62.2614
								ENO	TPI	65.0165		NTD6	CYOR_u10m	62.2614
								ENO	TKT1	65.024		OBDHc	CYOR_u10m	62.2614
								ENO	TKT2	65.024		PRPPS	CYOR_u10m	62.2614
								ENO	PPM	65.024		PUNP2	CYOR_u10m	62.2614
								ENO	RPE	65.024		PUNP7	CYOR_u10m	62.2614
								ENO	PUNP3	65.0258		r0394	CYOR_u10m	62.2614
								ENO	r1384	65.0258		RNDR1	CYOR_u10m	62.2614
								ENO	r0446	65.0374		THRD_L	CYOR_u10m	62.2614
								ENO	r1001	65.0374		CREATtmdiffir	CYOR_u10m	62.2614
								ENO	r1477	65.0374		CYOR_u10m	DNDPt19m	62.2614
								ENO	r1472	65.0374		H2CO3D	CYOR_u10m	62.2614
								ENO	r1474	65.0374		LEUTAm	CYOR_u10m	62.2614
								ENO	r1481	65.0374		GAPD	r0853	62.3497
								ENO	r0578	65.0426		GAPD	PPM	62.853
								ADEt	O2t	65.1127		ENO	r0838	63.4649
								PUNP1	O2t	65.1146		GAPD	RPE	63.5146
								ENO	MTHFCm	65.1176		GAPD	TKT1	63.5146
								ENO	GLYtm	65.1176		GAPD	TKT2	63.5146
								ENO	10FTHFtm	65.1176		GAPD	ACALDt	64.1041
								ENO	MTHFC	65.1176		GAPD	PIt2m	64.1371
								ENO	GHMT2r	65.1335		ABTArm	GAPD	64.1863
								CTPS1	ENO	65.1467		GAPD	4ABUTtm	64.1863
								ENO	PUNP7	65.1636		GAPD	r0178	64.1863
								ENO	r0394	65.1636		GAPD	ARTFR12	64.2237
								MMMm	O2t	65.1642		ENO	METS	64.3129
								PPCOACm	O2t	65.1642		GAPD	3MOBt2im	64.3814
								THRD_L	O2t	65.1902		GAPD	3MOPt2im	64.3814
								ASPTA	ENO	65.2163		GAPD	ILEt5m	64.3814
								ENO	MDH	65.2163		GAPD	ILETAm	64.3814
								ENO	MTHGXLt	65.2652		GAPD	LEUTA	64.3814
								ENO	r0055	65.2652		GAPD	4MOPt2im	64.3922
								PGM	NADH2_u10m	65.2786		GAPD	LEUTAm	64.3922
								ENO	r0392	65.285		GAPD	LEUt5m	64.3922
								ENO	HDCEAtr	65.285		ARTPLM3	GAPD	64.5125
								ENO	r0160	65.285		ENO	MMMm	64.6153
								ENO	HPYRRy	65.285		GAPD	O2tm	64.6964
								ENO	PGM	65.285		GAPD	r0911	65.059
								PGM	TPI	65.3126		GAPD	PROtm	65.2018
								GHMT2r	O2t	65.3633		GAPD	r0801	65.4057
								PGM	r0074	65.5711		GAPD	ATPtm	65.4057
								PGM	ADEt	65.5973		GAPD	METS	65.515
								PGM	PUNP1	65.6002		GAPD	r0578	65.7224
								r0381	O2t	65.6165		GAPD	GLUt2m	65.7623
								PGM	PPCOACm	65.6616		GAPD	ILETA	65.7636
								MMMm	PGM	65.6616		ENO	TRDR	66.0229
								PGM	MTHGXLt	65.7043		DRPA	ENO	66.0428
								PGM	r0055	65.7043		ENO	r0570	66.0428
								PGM	r0160	65.7638		GAPD	TPI	66.5261
								HPYRRy	PGM	65.7638		GAPD	SUCD1m	66.5291
								r0392	O2t	65.7997		GAPD	CO2tm	66.5875
								HPYRRy	O2t	65.7997		GAPD	L_LACtm	66.5875
								r0160	O2t	65.7997		GAPD	r0390	66.696
								PGM	4ABUTtm	65.8004		GAPD	L_LACtcm	66.7951
								PGM	r0178	65.8004		PGK	r0838	66.7983
								ABTArm	PGM	65.8004		ENO	URIDK2m	66.8466
								r0391	O2t	65.8538		DURIPP	ENO	66.8466
								NICRNS	O2t	65.8538		ENO	r0818	66.8466
								NP1	O2t	65.8538		ENO	RE1530C	66.8466
								H2Otly	O2t	65.9134		ENO	PYNP2r	66.8466
								PGM	THRD_L	65.9299		ENO	r0853	66.9153
								PUNP3	O2t	65.9564		ATPS4m	r0838	66.9182
								r1384	O2t	65.9564		ACOAD9m	ATPS4m	67.0048
								ASPTA	O2t	65.9706		CK	GAPD	67.0261
								MDH	O2t	65.9706		GAPD	CREATtmdiffir	67.0261
								r1472	O2t	65.973		GAPD	PCREATtmdiffir	67.0261
								r0446	O2t	65.973		CKc	GAPD	67.0261
								O2t	r1001	65.973		ENO	GAPD	67.177
								r1474	O2t	65.973		ENO	PGK	67.177
								r1477	O2t	65.973		ACOAD9m	GAPD	67.251
								r1481	O2t	65.973		GAPD	DNDPt19m	67.3755
								r0578	O2t	65.973		FACOAL161	GAPD	67.4444
								PGM	r0381	66.0473		GAPD	r0510	67.4565
								CTPS1	O2t	66.0761		GAPD	r0511	67.4565
								PUNP7	O2t	66.0928		GAPD	r0074	67.4782
								r0394	O2t	66.0928		GAPD	ADEt	67.6009
								PGM	H2Otly	66.1228		GAPD	GHMT2r	67.6054
								PGM	RPE	66.1546		GAPD	CYOOm3	67.7081
								PGM	TKT1	66.1546		GAPD	r0381	67.7973
								PGM	PPM	66.1546		GAPD	NTD6	67.8122
								PGM	TKT2	66.1546		GAPD	RNDR1	67.8122
								TKT1	ATPS4m	66.1826		ENO	ACALDt	67.8405
								PPM	ATPS4m	66.1826		GAPD	H2Otly	67.8498
								RPE	ATPS4m	66.1826		GAPD	MTHGXLt	67.9617
								TKT2	ATPS4m	66.1826		GAPD	r0055	67.9617
								HDCEAtr	O2t	66.1836		GAPD	PUNP2	68.0388
								ABTArm	O2t	66.2129		CSm	GAPD	68.2012
								MTHGXLt	O2t	66.2129		GAPD	MDHm	68.2012
								O2t	O2tm	66.2129		ALATA_L	GAPD	68.2695
								r0055	O2t	66.2129		GAPD	PRPPS	68.3206
								r0178	O2t	66.2129		GAPD	DM_pmtcoa_LPAREN_r_RPAREN_	68.3514
								NADH2_u10m	O2t	66.2129		GAPD	r0446	68.3514
								4ABUTtm	O2t	66.2129		GAPD	r1001	68.3514
								NICRNS	PGM	66.2856		GAPD	r1472	68.3514
								PGM	r0391	66.2856		GAPD	r1474	68.3514
								NP1	PGM	66.2856		GAPD	r1477	68.3514
								PGM	r1384	66.3916		GAPD	r1481	68.3514
								PGM	PUNP3	66.3916		GAPD	r0899	68.3581
								PGM	r1001	66.4087		CTPS1	GAPD	68.3907
								PGM	r1472	66.4087		GAPD	PUNP1	68.3911
								PGM	r1474	66.4087		METS	PGK	68.4338
								PGM	r1477	66.4087		FTCD	GAPD	68.4418
								PGM	r1481	66.4087		GAPD	HISD	68.4418
								PGM	r0446	66.4087		GAPD	IZPN	68.4418
								PGM	r0578	66.4087		GAPD	URCN	68.4418
								CTPS1	PGM	66.515		GAPD	GluForTx	68.4418
								PGM	PUNP7	66.5323		FUMm	GAPD	68.4557
								PGM	r0394	66.5323		GAPD	H2Otm	68.4557
								MDH	PGM	66.5404		GAPD	GK1	68.4677
								ASPTA	PGM	66.5404		GAPD	10FTHFtm	68.4816
								MTHFC	PGM	66.5833		GAPD	GLYtm	68.4816
								GHMT2r	PGM	66.6202		GAPD	MTHFC	68.4816
								PGM	10FTHFtm	66.6211		GAPD	MTHFCm	68.4816
								MTHFCm	PGM	66.6211		GAPD	CITRtm	68.502
								PGM	GLYtm	66.6211		GAPD	CO2t	68.5095
								PGM	HDCEAtr	66.6557		GAPD	H2CO3D	68.5095
								PGM	r0392	66.6562		GAPD	GUAPRT	68.5183
								METS	TPI	66.8729		GAPD	PUNP3	68.5183
								ATPS4m	r0838	67.0883		GAPD	r1384	68.5183
								METS	O2tm	69.1358		GAPD	PUNP7	68.5183
								MMMm	ATPS4m	69.2593		GAPD	r0394	68.5245
								MTHFCm	ATPS4m	71.2822		GAPD	GLUDxm	68.5327
								MTHFC	ATPS4m	71.2822		GAPD	GLUDym	68.5327
								10FTHFtm	ATPS4m	71.4532		GAPD	OBDHc	68.5419
								ATPS4m	GLYtm	71.5239		GAPD	PPCOACm	68.5419
								r0178	ATPS4m	71.7159		GAPD	PGK	68.5553
								4ABUTtm	ATPS4m	71.7159		GAPD	PGM	68.5553
								ABTArm	ATPS4m	71.7159		GAPD	THRD_L	68.5553
								ADEt	ATPS4m	72.5511		PGK	PGM	68.5553
								PUNP1	ATPS4m	72.6292		MMMm	PGM	68.7062
								r0578	ATPS4m	72.9436		ATPS4m	MTHGXLt	68.8902
								r0381	ATPS4m	72.9727		r0055	ATPS4m	68.8902
								ATPS4m	O2tm	73.0301		PGK	MTHGXLt	69.0499
								THRD_L	ATPS4m	73.5086		PGK	r0055	69.0499
								ATPS4m	H2Otly	73.5742		ENO	HIBDm	69.0514
								TPI	CYOOm3	73.6034		METS	ATPS4m	69.3428
								URCN	ATPS4m	73.6982		PGK	r0178	69.5707
								FTCD	ATPS4m	73.6982		ABTArm	PGK	69.5707
								IZPN	ATPS4m	73.6982		PGK	4ABUTtm	69.5707
								GluForTx	ATPS4m	73.6982		ENO	GHMT2r	69.641
								HISD	ATPS4m	73.6982		ENO	ADEt	69.8444
								PPCOACm	ATPS4m	73.7291		4ABUTtm	ATPS4m	70.011
								r0074	ATPS4m	73.9492		ABTArm	ATPS4m	70.011
								GHMT2r	ATPS4m	74.8354		r0178	ATPS4m	70.011
								FTCD	METS	74.8435		METS	PGM	70.2916
								GluForTx	METS	74.8435		ENO	PUNP1	70.3205
								HISD	METS	74.8435		PGK	O2tm	70.4789
								METS	URCN	74.8435		ENO	r0390	70.5886
								IZPN	METS	74.8435		HIBDm	PGM	70.7392
								CTPS1	ATPS4m	75.0482		PGK	r0578	70.8181
								NP1	ATPS4m	75.0689		ENO	PIt2m	70.9384
								NICRNS	ATPS4m	75.0689		ATPS4m	O2tm	70.9572
								r0391	ATPS4m	75.0689		ENO	3MOBt2im	71.0531
								TKT1	O2tm	75.1972		ENO	3MOPt2im	71.0531
								PPM	O2tm	75.1972		ENO	ILEt5m	71.0531
								RPE	O2tm	75.1972		ENO	ILETAm	71.0531
								TKT2	O2tm	75.1972		ENO	LEUTA	71.0531
								PUNP3	ATPS4m	75.2021		TPI	ATPS4m	71.2351
								r1384	ATPS4m	75.2021		ENO	SUCD1m	71.3574
								r1472	ATPS4m	75.2127		ENO	ILETA	71.4381
								ATPS4m	HDCEAtr	75.2127		PGK	r0390	71.4497
								ATPS4m	r1001	75.2127		DRPA	PGK	71.5949
								MDH	ATPS4m	75.2127		PGK	TRDR	71.5949
								PUNP7	ATPS4m	75.2127		r0570	ATPS4m	71.5949
								r0160	ATPS4m	75.2127		ACALDt	ATPS4m	71.5949
								r0394	ATPS4m	75.2127		DRPA	ATPS4m	71.5949
								r0446	ATPS4m	75.2127		PGK	ACALDt	71.5949
								r1474	ATPS4m	75.2127		PGK	r0570	71.5949
								r1477	ATPS4m	75.2127		TRDR	ATPS4m	71.5949
								ATPS4m	CYOOm3	75.2127		PGK	PIt2m	71.6946
								ATPS4m	NADH2_u10m	75.2127		ENO	LEUt5m	71.695
								HPYRRy	ATPS4m	75.2127		ENO	4MOPt2im	71.695
								r0392	ATPS4m	75.2127		ENO	LEUTAm	71.695
								r1481	ATPS4m	75.2127		PGM	r0838	71.727
								ASPTA	ATPS4m	75.2127		ILETAm	PGK	71.7824
								GHMT2r	METS	75.4336		LEUTAm	PGK	71.7824
								METS	r0838	75.8269		PGK	3MOBt2im	71.7824
								METS	CYOOm3	75.8594		PGK	3MOPt2im	71.7824
								METS	TKT2	76.2353		PGK	ILEt5m	71.7824
								METS	PPM	76.2353		PGK	LEUt5m	71.7824
								METS	RPE	76.2353		LEUTA	PGK	71.7824
								METS	TKT1	76.2353		PGK	4MOPt2im	71.7824
								IZPN	TPI	76.9744		ENO	10FTHFtm	71.8095
								FTCD	TPI	76.9744		ENO	MTHFCm	71.8095
								GluForTx	TPI	76.9744		ENO	MTHFC	71.8095
								HISD	TPI	76.9744		r0578	ATPS4m	71.8476
								TPI	URCN	76.9744		PGK	ADEt	71.8679
								r0055	O2tm	77.6239		PGK	TPI	71.9235
								MTHGXLt	O2tm	77.6239		PGK	SUCD1m	72.1439
								PPM	TPI	78.4789		PGK	PYNP2r	72.1721
								MTHFC	TPI	79.1972		ATPS4m	r0818	72.1721
								TPI	10FTHFtm	79.1972		DURIPP	ATPS4m	72.1721
								MTHFCm	TPI	79.1972		DURIPP	PGK	72.1721
								TPI	GLYtm	79.1972		PGK	r0818	72.1721
								O2tm	CYOOm3	79.4151		PGK	URIDK2m	72.1721
								METS	ADEt	79.5948		PYNP2r	ATPS4m	72.1721
								METS	PUNP1	79.6625		RE1530C	ATPS4m	72.1721
								METS	r0055	79.7784		URIDK2m	ATPS4m	72.1721
								METS	MTHGXLt	79.7784		PGK	RE1530C	72.1721
								MTHFCm	O2tm	79.8092		SUCD1m	ATPS4m	72.1739
								MTHFC	O2tm	79.8092		PGK	r0853	72.1864
								METS	MMMm	79.8334		ATPS4m	r0853	72.1864
								METS	PPCOACm	79.8334		PGK	PUNP1	72.2901
								ABTArm	METS	79.8998		PGK	r0074	72.3021
								METS	r0178	79.8998		ENO	GLYtm	72.4457
								METS	4ABUTtm	79.8998		ARTPLM3	ENO	72.506
								10FTHFtm	O2tm	79.9915		ENO	ARTFR12	72.506
												ALATA_L	PGK	72.5671
												MTHFC	PGK	72.5805
												MTHFCm	PGK	72.5805
												PGK	10FTHFtm	72.5805
												PGK	GLYtm	72.5805
												r0390	ATPS4m	72.5958
												PGK	r0911	72.6753
												ILETA	PGK	72.6788
												GLUDxm	PGK	72.6805
												GLUDym	PGK	72.6805
												ENO	r0801	72.7176
												ENO	ATPtm	72.7176
												PGK	PROtm	72.7391
												PGK	ATPtm	72.8578
												PGK	r0801	72.8578
												PGK	CO2tm	72.8891
												PGK	L_LACtcm	72.8891
												PGK	L_LACtm	72.8891
												PGK	GLUt2m	72.9107
												ARTPLM3	PGK	72.9155
												PGK	ARTFR12	72.9155
												ENO	GLUDym	72.918
												ENO	GLUDxm	72.918
												ADEt	ATPS4m	72.9843
												ENO	O2tm	73.144
												ACOAD9m	PGK	73.1914
												CK	ENO	73.2269
												CKc	ENO	73.2269
												ENO	CREATtmdiffir	73.2269
												ENO	PCREATtmdiffir	73.2269
												r0074	ATPS4m	73.2282
												PGK	r0381	73.306
												CSm	PGK	73.3213
												MDHm	PGK	73.3213
												PGK	DNDPt19m	73.3242
												PGK	PRPPS	73.3542
												ARTPLM3	ATPS4m	73.3571
												ARTFR12	ATPS4m	73.3571
												PGK	CYOOm3	73.3593
												PUNP1	ATPS4m	73.3791
												NTD6	PGK	73.4002
												PGK	RNDR1	73.4002
												PGK	H2Otly	73.4047
												PGK	PUNP2	73.4125
												CTPS1	PGK	73.4253
												PGK	CREATtmdiffir	73.4328
												CK	PGK	73.4328
												CKc	PGK	73.4328
												PGK	PCREATtmdiffir	73.4328
												PGK	PPCOACm	73.488
												GHMT2r	PGK	73.504
												CSm	ATPS4m	73.5083
												MDHm	ATPS4m	73.5083
												GK1	PGK	73.509
												PGK	TKT1	73.5117
												PGK	TKT2	73.5117
												PGK	RPE	73.5117
												PGK	PPM	73.5359
												PGK	r0899	73.5443
												PGK	THRD_L	73.5498
												ALATA_L	ATPS4m	73.5535
												PGK	r0446	73.5693
												PGK	r1001	73.5693
												PGK	r1472	73.5693
												PGK	r1474	73.5693
												PGK	r1481	73.5693
												PGK	r1477	73.5693
												FTCD	PGK	73.5724
												GluForTx	PGK	73.5724
												IZPN	PGK	73.5724
												PGK	URCN	73.5724
												HISD	PGK	73.5724
												PGK	CO2t	73.5726
												H2CO3D	PGK	73.5726
												OBDHc	PGK	73.5835
												PGK	r0510	73.5849
												PGK	r0511	73.5849
												FACOAL161	PGK	73.5849
												PGK	CITRtm	73.5852
												DRPA	PGM	73.5905
												PGM	r0570	73.5905
												PGM	TRDR	73.5905
												GUAPRT	PGK	73.5907
												PGK	PUNP3	73.5907
												PGK	PUNP7	73.5907
												PGK	r0394	73.5907
												PGK	r1384	73.5907
												FUMm	PGK	73.6016
												PGK	H2Otm	73.6016
												PGK	DM_pmtcoa_LPAREN_r_RPAREN_	73.6031
												10FTHFtm	ATPS4m	73.8032
												ATPS4m	GLYtm	73.8032
												MTHFC	ATPS4m	73.8032
												MTHFCm	ATPS4m	73.8032
												RPE	ATPS4m	73.8268
												TKT1	ATPS4m	73.8268
												TKT2	ATPS4m	73.8268
												PPM	ATPS4m	73.877
												GLUDxm	ATPS4m	73.8933
												GLUDym	ATPS4m	73.8933
												ENO	DNDPt19m	73.9372
												ATPS4m	CO2tm	74.0101
												ATPS4m	L_LACtcm	74.0101
												ATPS4m	L_LACtm	74.0101
												ATPS4m	PIt2m	74.0191
												ATPS4m	ATPtm	74.0806
												ATPS4m	r0801	74.0806
												ENO	MTHGXLt	74.1141
												ENO	r0055	74.1141
												ATPS4m	r0911	74.1375
												ATPS4m	DNDPt19m	74.1476
												ATPS4m	PROtm	74.1517
												ENO	r0578	74.2257
												r0381	ATPS4m	74.3105
												3MOBt2im	ATPS4m	74.3517
												3MOPt2im	ATPS4m	74.3517
												4MOPt2im	ATPS4m	74.3517
												ATPS4m	ILEt5m	74.3517
												ILETAm	ATPS4m	74.3517
												LEUTA	ATPS4m	74.3517
												LEUTAm	ATPS4m	74.3517
												ATPS4m	LEUt5m	74.3517
												PRPPS	ATPS4m	74.3973
												ATPS4m	H2Otly	74.4067
												CTPS1	ATPS4m	74.421
												ENO	r0074	74.44
												GHMT2r	ATPS4m	74.4885
												ATPS4m	r0899	74.4979
												PPCOACm	ATPS4m	74.5043
												r0446	ATPS4m	74.5118
												r1477	ATPS4m	74.5118
												r1481	ATPS4m	74.5118
												ATPS4m	r1001	74.5118
												r1472	ATPS4m	74.5118
												r1474	ATPS4m	74.5118
												FTCD	ATPS4m	74.5136
												GluForTx	ATPS4m	74.5136
												HISD	ATPS4m	74.5136
												IZPN	ATPS4m	74.5136
												URCN	ATPS4m	74.5136
												GK1	ATPS4m	74.5244
												NTD6	ATPS4m	74.5339
												RNDR1	ATPS4m	74.5339
												PUNP2	ATPS4m	74.5379
												PGM	PYNP2r	74.5504
												PGM	r0818	74.5504
												DURIPP	PGM	74.5504
												PGM	RE1530C	74.5504
												PGM	URIDK2m	74.5504
												THRD_L	ATPS4m	74.5645
												ATPS4m	CO2t	74.5703
												H2CO3D	ATPS4m	74.5703
												OBDHc	ATPS4m	74.5808
												ATPS4m	CITRtm	74.5825
												FACOAL161	ATPS4m	74.5835
												ATPS4m	DM_pmtcoa_LPAREN_r_RPAREN_	74.5898
												PGM	r0853	74.5925
												GUAPRT	ATPS4m	74.5959
												PUNP3	ATPS4m	74.5959
												PUNP7	ATPS4m	74.5959
												r0394	ATPS4m	74.5959
												r1384	ATPS4m	74.5959
												ATPS4m	CREATtmdiffir	74.5999
												ATPS4m	CYOOm3	74.5999
												ATPS4m	GLUt2m	74.5999
												ATPS4m	H2Otm	74.5999
												ATPS4m	PCREATtmdiffir	74.5999
												CK	ATPS4m	74.5999
												CKc	ATPS4m	74.5999
												ILETA	ATPS4m	74.5999
												r0510	ATPS4m	74.5999
												FUMm	ATPS4m	74.5999
												r0511	ATPS4m	74.5999
												ENO	r0911	74.7854
												ENO	L_LACtcm	74.8195
												ENO	CO2tm	74.8195
												ENO	L_LACtm	74.8195
												ENO	PROtm	74.8513
												ENO	4ABUTtm	74.9668
												ENO	r0178	74.9668
												ABTArm	ENO	74.9668
												PGM	ACALDt	75.0643
												CSm	ENO	75.0814
												ENO	MDHm	75.0814
												ENO	CYOOm3	75.4378
												ENO	GLUt2m	75.5409
												CTPS1	ENO	75.5516
												ENO	RNDR1	75.5677
												ENO	NTD6	75.5677
												ENO	FUMm	75.576
												ENO	H2Otm	75.576
												ENO	r0381	75.6003
												ENO	PUNP3	75.6029
												ENO	r1384	75.6029
												ENO	r0446	75.6038
												ENO	r1472	75.6038
												ENO	r1474	75.6038
												ENO	r1477	75.6038
												ENO	r1481	75.6038
												ENO	r1001	75.6038
												ENO	PUNP2	75.6358
												ENO	H2Otly	75.6368
												PGM	MTHGXLt	75.6436
												PGM	r0055	75.6436
												ENO	FTCD	75.6828
												ENO	GluForTx	75.6828
												ENO	HISD	75.6828
												ENO	IZPN	75.6828
												ENO	URCN	75.6828
												ENO	PPM	75.6999
												ENO	RPE	75.6999
												ENO	TKT1	75.6999
												ENO	TKT2	75.6999
												ALATA_L	ENO	75.7033
												ENO	r0511	75.7091
												ENO	r0510	75.7091
												ENO	CITRtm	75.7126
												ENO	PUNP7	75.7162
												ENO	CO2t	75.7172
												ENO	H2CO3D	75.7172
												ENO	r0394	75.7175
												ENO	GK1	75.7216
												ENO	GUAPRT	75.7216
												ENO	FACOAL161	75.7243
												ENO	OBDHc	75.7243
												ENO	PPCOACm	75.7243
												ACOAD9m	ENO	75.7243
												ENO	DM_pmtcoa_LPAREN_r_RPAREN_	75.7243
												ENO	PGM	75.7243
												ENO	r0899	75.7243
												ENO	THRD_L	75.7243
												ENO	TPI	75.7243
												ENO	PRPPS	75.7243
												PGM	PIt2m	76.0816
												MMMm	SUCD1m	76.1054
												ABTArm	PGM	76.1846
												PGM	r0178	76.1846
												PGM	4ABUTtm	76.1846
												ILETAm	PGM	76.277
												PGM	ILEt5m	76.277
												LEUTA	PGM	76.277
												PGM	3MOBt2im	76.277
												PGM	3MOPt2im	76.277
												PGM	4MOPt2im	76.3484
												PGM	LEUt5m	76.3484
												LEUTAm	PGM	76.3484
												HIBDm	SUCD1m	76.6793
												GHMT2r	PGM	76.84
												PGM	ATPtm	76.8679
												PGM	r0801	76.8679
												ILETA	PGM	76.9236
												PGM	ADEt	77.0143
												PGM	O2tm	77.0794
												CSm	MMMm	77.097
												PGM	ARTFR12	77.1604
												ARTPLM3	PGM	77.1668
												CKc	PGM	77.3292
												CK	PGM	77.3292
												PGM	CREATtmdiffir	77.3292
												PGM	PCREATtmdiffir	77.3292
												PGM	PUNP1	77.5653
												MDHm	MMMm	77.8013
												PGM	10FTHFtm	77.8485
												MTHFCm	PGM	77.8485
												MTHFC	PGM	77.8485
												PGM	r0911	78.0714
												PGM	GLYtm	78.1964
												PGM	PROtm	78.219
												PGM	SUCD1m	78.2314
												PGM	r0578	78.3608
												TPI	TRDR	78.3743
												DRPA	TPI	78.3743
												TPI	r0570	78.3743
												ALATA_L	PGM	78.5137
												PGM	GLUt2m	78.5307
												PGM	r0390	78.5307
												PGM	CO2tm	78.7284
												PGM	L_LACtm	78.7284
												PGM	L_LACtcm	78.7864
												GLUDxm	PGM	79.0881
												GLUDym	PGM	79.0881
												PGM	DNDPt19m	79.3534
												PGM	r0074	79.5564
												PGM	TPI	79.582
												ACOAD9m	PGM	79.7846
