# Supplementary material for: Inhibiting the reproduction of SARS-CoV-2 through perturbations in human lung cell metabolic network
Source: Life Sci Alliance. 2020 Nov 24;4(1):e202000869. doi: 10.26508/lsa.202000869 (PMC7723300; doi:10.26508/lsa.202000869)
Supplement: Supplementary file 3 [file LSA-2020-00869_TableS3.xlsx]

## Sheet: virus and host components
	Table S3. The composition and stoichiometries of building block metabolites in the virus biomass and human lung cell specific maintenance pseudo reactions.
	virus components								host components
		mmol/gDW		RNA	mmol/gDW					g/gDW	mmol/gDW		carbohydrate	mmol/g carbohydrate
	protein	6.22421		A	0.121258				protein	0.706	6.35466		g6p	3.87592
	RNA	0.390983		C	0.0742336				DNA	0.014	0.045614
	total	6.6152		G	0.0742336				RNA	0.058	0.182299		DNA	mmol/g DNA		RNA	mmol/g RNA
				U	0.121258				carbohydrate	0.071	0.27519		A	0.941643		A	0.925862
									lipid	0.097	0.291437		C	0.674429		C	0.673034
	aminoacids	mmol/gDW							other	0.054	0		G	0.707		G	0.622707
	A	0.476455							total		7.1492		T	0.935071		U	0.921483
	C	0.123625											total	3.25814			3.14309
	D	0.267319
	E	0.213712							aminoacids	mmol/g protein		lipid	mmol/g lipid
	F	0.308146							A	0.634777		cholesterol	0.21032
	G	0.44635							C	0.192773		cardiolipin	0.120186
	H	0.100939							D	0.448877		1-phosphatidyl-1D-myo-inositol(1-)	0.240361
	I	0.400554							E	0.654712		phosphatidylcholine	1.59237
	K	0.301609							F	0.320638		phosphatidylethanolamine	0.570866
	L	0.66856							G	0.597413		phosphatidylglycerol(1-)	0.0300412
	M	0.0967881							H	0.226225		sphingomyelin d18:1(1+)	0.180268
	N	0.357603							I	0.389851		phosphatidyl-L-serine(1-)	0.0600928
	P	0.257677							K	0.539076
	Q	0.275393							L	0.874309
	R	0.320927							M	0.19515
	S	0.470571							N	0.328768
	T	0.434713							P	0.569698
	V	0.35149							Q	0.431385
	W	0.11202							R	0.50246
	Y	0.239764							S	0.731275
									T	0.478438
									V	0.54178
									W	0.103504
									Y	0.239833
									total	9.00094
