# Supplementary material for: Inhibiting the reproduction of SARS-CoV-2 through perturbations in human lung cell metabolic network
Source: Life Sci Alliance. 2020 Nov 24;4(1):e202000869. doi: 10.26508/lsa.202000869 (PMC7723300; doi:10.26508/lsa.202000869)
Supplement: Supplementary file 5 [file LSA-2020-00869_TableS5.xlsx]

## Sheet: Sheet1
	Table S5. Results of the single and combined reaction perturbations (gene knock-out simulations) on SARS-CoV-2 biomass and human lung cell specific maintenance pseudo reactions. Reaction pairs, whose combined perturbation results in a virus optimal biomass reduction below 80% of the original are shown. Simulation results with the minimal media with two different uptake flux limits are shown (flux…
	SINGLE KO EFFECTS ON VIRUS vs. HOST OPTIMA									DOUBLE KO EFFECTS ON VIRUS vs. HOST OPTIMA
				min10			min1000			min10_doubleKO_above5%difference					min1000_doubleKO_above5%difference
	rxnName	gene	subsystem	virus_optima_KO	host_optima_KO		virus_optima_KO	host_optima_KO		rxnAname	rxnBname	doubleKOoptimaVirus	doubleKOoptimaHost		rxnAname	rxnBname	doubleKOoptimaVirus	doubleKOoptimaHost
	3MOBte		Transport, extracellular	0	0		0	0		NICRNS	CYOR_u10m	60.2351	68.5141		CYOR_u10m	DM_pmtcoa_LPAREN_r_RPAREN_	62.0525	68.9382
	3MOPte		Transport, extracellular	0	0		0	0		NP1	CYOR_u10m	60.2351	68.5141		ADEt	CYOR_u10m	61.729	68.5488
	AHC	HGNC:343, HGNC:344	Methionine and cysteine metabolism	0	0		0	0		r0391	CYOR_u10m	60.2351	68.5141		r0055	CYOR_u10m	58.7456	65.5449
	AHCYSte		Transport, extracellular	0	0		0	0		PUNP3	CYOR_u10m	60.4017	68.6209		CYOR_u10m	MTHGXLt	58.7456	65.5449
	ARGSL	HGNC:746	Alanine and aspartate metabolism	0	0		0	0		r1384	CYOR_u10m	60.4017	68.6209		DRPA	CYOR_u10m	60.6582	67.4184
	ARGSS	HGNC:758	Alanine and aspartate metabolism	0	0		0	0		CTPS1	CYOR_u10m	60.4017	68.6171		ACALDt	CYOR_u10m	60.6582	67.4184
	ASNS1	HGNC:753	Alanine and aspartate metabolism	0	0		0	0		MDH	CYOR_u10m	60.0644	68.2555		r0570	CYOR_u10m	60.6582	67.4184
	ASPCTr	HGNC:1424	Pyrimidine synthesis	0	0		0	0		ASPTA	CYOR_u10m	60.0644	68.2555		GHMT2r	CYOR_u10m	62.0914	68.8507
	ATPS4m	HGNC:13213, HGNC:14247, HGNC:18799, HGNC:8016, HGNC:823, HGNC:830, HGNC:833, HGNC:837, HGNC:838, HGNC:840, HGNC:842, HGNC:845, HGNC:846, HGNC:847, HGNC:848, HGNC:850, HGNC:14247, HGNC:8016, HGNC:823, HGNC:830, HGNC:833, HGNC:837, HGNC:838, HGNC:840, HGNC:841, HGNC:845, HGNC:846, HGNC:847, HGNC:848, HGNC:14247, HGNC:8016, HGNC:823, HGNC:830, HGNC:833, HGNC:837, HGNC:838, HGNC:840, HGNC:842, HGNC:8…	Oxidative phosphorylation	75.2127	77.6538		74.5999	75.0198		r0392	CYOR_u10m	60.5042	68.6923		MTHFC	CYOR_u10m	62.2061	68.9615
	BTNDe	HGNC:1122	Biotin metabolism	0	0		0	0		CYOR_u10m	HDCEAtr	60.5042	68.6923		MTHFCm	CYOR_u10m	62.2061	68.9615
	CARPEPT1tc	HGNC:10920	Transport, extracellular	0	0		0	0		PUNP7	CYOR_u10m	60.5042	68.6923		CYOR_u10m	GLYtm	62.2061	68.9615
	CBPS	HGNC:1424	Pyrimidine synthesis	0	0		0	0		CYOR_u10m	NADH2_u10m	60.5042	68.6923		10FTHFtm	CYOR_u10m	62.2061	68.9615
	COAtl		Transport, lysosomal	0	0		-1.1277e-11	0		HPYRRy	CYOR_u10m	60.5042	68.6923		DURIPP	CYOR_u10m	60.998	67.7442
	CYOR_u10m	HGNC:12582, HGNC:12585, HGNC:12586, HGNC:12587, HGNC:12590, HGNC:2579, HGNC:29594, HGNC:30862, HGNC:30863, HGNC:7427	Oxidative phosphorylation	60.5042	68.6923		62.2614	68.9688		r0160	CYOR_u10m	60.5042	68.6923		RE1530C	CYOR_u10m	60.998	67.7442
	CYSTGL	HGNC:2501	Methionine and cysteine metabolism	0	0		0	0		ATPS4m	CYOR_u10m	60.5042	68.6923		PYNP2r	CYOR_u10m	60.998	67.7442
	CYSTS	HGNC:1550	Methionine and cysteine metabolism	0	0		0	0		CYOR_u10m	CYOOm3	60.5042	68.6923		PPM	CYOR_u10m	61.2387	67.9845
	DHORD9	HGNC:2867	Pyrimidine synthesis	0	0		0	0		r0394	CYOR_u10m	60.5042	68.6923		TKT1	CYOR_u10m	61.2387	67.9845
	DHORTS	HGNC:1424	Pyrimidine synthesis	0	0		0	0		GHMT2r	CYOR_u10m	60.4883	68.6382		TKT2	CYOR_u10m	61.2387	67.9845
	DPCOAtl		Transport, lysosomal	0	0		9.08963e-13	0		CYOR_u10m	H2Otly	58.8401	66.8153		RPE	CYOR_u10m	61.2387	67.9845
	ENO	HGNC:3350, HGNC:3354, HGNC:3354, HGNC:3353	Glycolysis/gluconeogenesis	65.285	66.3368		75.7243	75.38		GluForTx	CYOR_u10m	60.2681	68.1458		CYOR_u10m	r0853	61.0106	67.7553
	G5SADrm		Arginine and Proline Metabolism	0	0		0	0		URCN	CYOR_u10m	60.2681	68.1458		URIDK2m	CYOR_u10m	60.998	67.7418
	GAPD	HGNC:24864, HGNC:4141	Glycolysis/gluconeogenesis	62.6583	62.4272		68.5553	69.6999		FTCD	CYOR_u10m	60.2681	68.1458		CYOR_u10m	r0818	60.998	67.7418
	GLNS	HGNC:21016, HGNC:4341	Glutamate metabolism	0	0		0	0		HISD	CYOR_u10m	60.2681	68.1458		PUNP3	CYOR_u10m	62.1547	68.8948
	GLYPHEHYc		Pentose phosphate pathway	0	0		0	0		IZPN	CYOR_u10m	60.2681	68.1458		r1384	CYOR_u10m	62.1547	68.8948
	GLYPHEPEPT1tc	HGNC:10920	Transport, extracellular	0	0		0	0		r0074	CYOR_u10m	59.7146	67.5359		CTPS1	CYOR_u10m	62.1547	68.8909
	HIBDm	HGNC:4907	Valine, leucine, and isoleucine metabolism	NA	NA		88.4369	88.9645		r0381	CYOR_u10m	58.2955	66.1122		SUCD1m	CYOR_u10m	61.887	68.6212
	LAPCOAl	HGNC:123, HGNC:124, HGNC:125, HGNC:29609	CoA catabolism	0	0		-1.4165e-12	0		r0578	CYOR_u10m	58.2707	66.0779		GLUDym	CYOR_u10m	62.2451	68.9688
	LEULEULAPc	HGNC:18449	Transport, extracellular	0	0		0	0		CYOR_u10m	O2tm	59.6967	67.2725		GLUDxm	CYOR_u10m	62.2451	68.9688
	LEULEUPEPT1tc	HGNC:10920	Transport, extracellular	0	0		0	0		PPCOACm	CYOR_u10m	58.8469	66.353		r0394	CYOR_u10m	62.2614	68.9688
	METS	HGNC:7468	Methionine and cysteine metabolism	81.848	51.4703		NA	NA		r0178	CYOR_u10m	58.661	66.1536		CK	CYOR_u10m	62.2614	68.9688
	MMMm	HGNC:7526	Valine, leucine, and isoleucine metabolism	NA	NA		86.998	87.0192		ABTArm	CYOR_u10m	58.661	66.1536		FUMm	CYOR_u10m	62.2614	68.9688
	NBAHH_ir	HGNC:20675, HGNC:24437	beta-Alanine metabolism	0	0		0	0		4ABUTtm	CYOR_u10m	58.661	66.1536		GK1	CYOR_u10m	62.2614	68.9688
	O2t		Transport, extracellular	66.2129	66.2129		58.0026	55.5562		THRD_L	CYOR_u10m	58.9295	66.3002		ILETA	CYOR_u10m	62.2614	68.9688
	O2tm		Transport, mitochondrial	82.8903	84.6841		NA	NA		10FTHFtm	CYOR_u10m	57.0875	64.4211		LEUTA	CYOR_u10m	62.2614	68.9688
	OCBTm	HGNC:8512	Urea cycle	0	0		0	0		CYOR_u10m	GLYtm	57.0875	64.4211		PRPPS	CYOR_u10m	62.2614	68.9688
	OMPDC	HGNC:12563	Pyrimidine synthesis	0	0		0	0		CYOR_u10m	r1001	60.5042	67.8248		3MOPt2im	CYOR_u10m	62.2614	68.9688
	ORNTArm	HGNC:8091	Urea cycle	0	0		0	0		r1481	CYOR_u10m	60.5042	67.8248		4MOPt2im	CYOR_u10m	62.2614	68.9688
	ORPT	HGNC:12563	Pyrimidine synthesis	0	0		0	0		r1472	CYOR_u10m	60.5042	67.8248		CYOR_u10m	H2Otm	62.2614	68.9688
	P5CRm	HGNC:9721	Arginine and Proline Metabolism	0	0		0	0		r1477	CYOR_u10m	60.5042	67.8248		CYOR_u10m	ILEt5m	62.2614	68.9688
	PGK	HGNC:8896, HGNC:8898	Glycolysis/gluconeogenesis	64.972	65.1022		73.6031	74.1016		r1474	CYOR_u10m	60.5042	67.8248		CYOR_u10m	LEUt5m	62.2614	68.9688
	PGM	HGNC:1093, HGNC:8888, HGNC:8889	Glycolysis/gluconeogenesis	66.6562	67.7032		80.7684	81.4872		r0446	CYOR_u10m	60.5042	67.8248		CYOR_u10m	r0899	62.2614	68.9688
	PNTEH	HGNC:12705, HGNC:12706, HGNC:16431	CoA catabolism	0	0		1.06235e-12	0		ADEt	CYOR_u10m	58.0537	65.2703		CKc	CYOR_u10m	62.2614	68.9688
	r0539	HGNC:23506	Taurine and hypotaurine metabolism	0	0		0	0		PUNP1	CYOR_u10m	58.0912	65.3033		CSm	CYOR_u10m	62.2614	68.9688
	r0591	HGNC:3356, HGNC:3358	CoA synthesis	0	0		2.21728e-12	0		CYOR_u10m	r0838	55.4637	62.4901		GUAPRT	CYOR_u10m	62.2614	68.9688
	r1150		Transport, lysosomal	0	0		0	0		PPM	CYOR_u10m	52.8481	59.7737		ILETAm	CYOR_u10m	62.2614	68.9688
	sink_octdececoa_LPAREN_c_RPAREN_		Fatty acid oxidation	0	0		0	0		TKT1	CYOR_u10m	52.8481	59.7737		MDHm	CYOR_u10m	62.2614	68.9688
	TPI	HGNC:12009	Glycolysis/gluconeogenesis	82.5278	82.8676		NA	NA		TKT2	CYOR_u10m	52.8481	59.7737		CYOR_u10m	GLUt2m	62.2614	68.9688
										RPE	CYOR_u10m	52.8481	59.7737		CYOR_u10m	PCREATtmdiffir	62.2614	68.9688
										MTHFCm	CYOR_u10m	57.0875	63.9777		THRD_L	CYOR_u10m	62.2614	68.9688
										MTHFC	CYOR_u10m	57.0875	63.9537		3MOBt2im	CYOR_u10m	62.2614	68.9688
										MMMm	CYOR_u10m	57.2243	64.0717		CREATtmdiffir	CYOR_u10m	62.2614	68.9688
										TPI	CYOR_u10m	43.9585	50.4188		PUNP7	CYOR_u10m	62.2614	68.9688
										CYOR_u10m	MTHGXLt	53.2974	59.599		LEUTAm	CYOR_u10m	62.2614	68.9688
										r0055	CYOR_u10m	53.2974	59.599		OBDHc	CYOR_u10m	62.2614	68.9685
										CYOR_u10m	O2t	44.3823	50.462		CITRtm	CYOR_u10m	62.2614	68.967
															CO2t	CYOR_u10m	62.2614	68.955
															H2CO3D	CYOR_u10m	62.2614	68.955
															PPCOACm	CYOR_u10m	62.2299	68.9229
															PUNP2	CYOR_u10m	62.2614	68.948
															NTD6	CYOR_u10m	62.2614	68.9475
															RNDR1	CYOR_u10m	62.2614	68.9261
															PUNP1	CYOR_u10m	62.1689	68.826
															ABTArm	CYOR_u10m	59.3163	65.9618
															r0178	CYOR_u10m	59.3163	65.9618
															4ABUTtm	CYOR_u10m	59.3163	65.9618
															r0390	CYOR_u10m	61.2051	67.8378
															ALATA_L	CYOR_u10m	61.635	68.2554
															TPI	CYOR_u10m	58.6054	65.2136
															CYOR_u10m	DNDPt19m	62.2614	68.8678
															IZPN	CYOR_u10m	61.5159	68.0872
															GluForTx	CYOR_u10m	61.5159	68.0872
															URCN	CYOR_u10m	61.5159	68.0872
															FTCD	CYOR_u10m	61.5159	68.0872
															HISD	CYOR_u10m	61.5159	68.0872
															r0511	CYOR_u10m	61.3265	67.8694
															r0510	CYOR_u10m	61.3265	67.8694
															CYOR_u10m	PROtm	62.2614	68.7932
															CYOR_u10m	PIt2m	62.2614	68.7807
															CYOR_u10m	r0911	62.2614	68.7807
															ARTPLM3	CYOR_u10m	61.3265	67.8441
															CYOR_u10m	r0801	62.2547	68.7497
															ATPtm	CYOR_u10m	62.2547	68.7497
															CO2tm	CYOR_u10m	62.144	68.6234
															CYOR_u10m	L_LACtcm	62.144	68.6234
															CYOR_u10m	L_LACtm	62.144	68.6234
															CYOR_u10m	H2Otly	60.9965	67.4345
															r1474	CYOR_u10m	61.0033	67.3741
															r1477	CYOR_u10m	61.0033	67.3741
															r0446	CYOR_u10m	61.0033	67.3741
															r1472	CYOR_u10m	61.0033	67.3741
															r1481	CYOR_u10m	61.0033	67.3741
															CYOR_u10m	r1001	61.0033	67.3741
															r0381	CYOR_u10m	60.1101	66.4692
															r0074	CYOR_u10m	61.4388	67.7723
															CYOR_u10m	r0838	58.1009	64.3969
															ATPS4m	CYOR_u10m	61.4255	67.6656
															CYOR_u10m	CYOOm3	61.4255	67.6656
															r0578	CYOR_u10m	59.4776	65.6039
															FACOAL161	CYOR_u10m	61.6472	67.4928
															PGM	CYOR_u10m	48.8081	54.5901
															ACOAD9m	CYOR_u10m	56.5377	62.2701
															HIBDm	CYOR_u10m	56.5377	62.2701
															ARTFR12	CYOR_u10m	61.3265	67.0485
															MMMm	CYOR_u10m	55.8432	61.4453
															CYOR_u10m	O2tm	59.6055	65.1478
															ENO	CYOR_u10m	46.0612	51.4485
