# Supplementary material for: Inhibiting the reproduction of SARS-CoV-2 through perturbations in human lung cell metabolic network
Source: Life Sci Alliance. 2020 Nov 24;4(1):e202000869. doi: 10.26508/lsa.202000869 (PMC7723300; doi:10.26508/lsa.202000869)
Supplement: Supplementary file 6 [file LSA-2020-00869_TableS6.xlsx]

## Sheet: single enforcements
	Table S6. Results of single and double flux enforcement perturbations on SARS-CoV-2 biomass and human lung cell specific maintenance pseudo reactions. Reaction pairs, whose combined perturbation results in a virus optimal biomass reduction below 80% of the original are shown. Simulation results with the minimal media with two different uptake flux limits are shown (flux limits set to −10 or −1,00…
	Effect of the enforcement of the boundaries of a single reaction on virus optimum
	media min10 results					media min1000 results
	rxnName	rxn flux (virus)	rxn flux (host)	% virus optimum (rxn. flux set to enforced boundaries)		rxnName	rxn flux (virus)	rxn flux (host)	% virus optimum (rxn. flux set to enforced boundaries)
	ASPCTr	0.290065	0.56483	75.6771		ASPCTr	12.9595	24.0955	76.8918
	CBPS	0.290065	0.56483	75.6771		CBPS	12.9595	24.0955	76.8918
	DHORD9	0.290065	0.56483	75.6771		DHORD9	12.9595	24.0955	76.8918
	DHORTS	-0.290065	-0.56483	75.6771		DHORTS	-12.9595	-24.0955	76.8918
	OMPDC	0.290065	0.56483	75.6771		OMPDC	12.9595	24.0955	76.8918
	ORPT	-0.290065	-0.56483	75.6771		ORPT	-12.9595	-24.0955	76.8918
	ASNS1	0.585375	1.03321	78.3278		ASNS1	26.1533	44.0767	79.6679
	GLNS	1.64353	2.39373	84.3298		GLNS	73.4292	102.116	85.9538
	THRD_L	9.14814	8.74399	83.9116		LEULEULAPc	34.7754	41.2021	92.201
	LEULEULAPc	0.778359	0.965829	90.2948		LEULEUPEPT1tc	34.7754	41.2021	92.201
	LEULEUPEPT1tc	0.778359	0.965829	90.2948

## Sheet: double enforcements
	Effect of the enforcement of the boundaries of two reactions on the virus optimum
	min 10 results, better than single enforcement				min 1000 results better than single enforcement
	rxn A	rxn B	virus optimum (%)		rxn A	rxn B	virus optimum (%)
	ASPCTr	DHFR	72.7546		DHFR	2148	ORPT	73.831
	CBPS	DHFR	72.7546		DHFR	5001	DHORD9	73.831
	DHORD9	DHFR	72.7546		DHFR	1226	DHORTS	73.831
	DHORTS	DHFR	72.7546		DHFR	2142	OMPDC	73.831
	OMPDC	DHFR	72.7546		ASPCTr	1225	DHFR	73.831
	ORPT	DHFR	72.7546		CBPS	1225	DHFR	73.831
