# Supplementary material for: Inhibiting the reproduction of SARS-CoV-2 through perturbations in human lung cell metabolic network
Source: Life Sci Alliance. 2020 Nov 24;4(1):e202000869. doi: 10.26508/lsa.202000869 (PMC7723300; doi:10.26508/lsa.202000869)
Supplement: Supplementary file 7 [file LSA-2020-00869_TableS7.xlsx]

## Sheet: minimal medium
Minimal medium definition
reaction ID in Recon 2.2	metabolite	lower bound	upper bound
EX_octdececoa_b	oleoyl-CoA	-10	1000
EX_carn_b	carnosine	-10	1000
EX_leuleu_b	leucylleucine	-10	1000
EX_3mob_b	3-methyl-2-oxobutanoate	-10	1000
EX_ahcys_b	S-adenosyl-L-homocysteine	-10	1000
EX_glyphe_b	glycylphenylalanine	-10	1000
EX_biocyt_b	biocytin	-10	1000
EX_3mop_b	3-methyl-2-oxovalerate	-10	1000
EX_thr_L_b	threonine	-10	1000
EX_trp_L_b	tryptophane	-10	1000
EX_o2_b	oxygen	-10	1000
EX_nh4_b	ammonium	-10	1000
EX_glc_D_b	glucose	-10	1000
lower bound defines maximum import rate, upper bound defines maximum export rate, both in mmol/gDW/h

## Sheet: Figure
	Table S7. The composition of the minimal media used in this study and results of simulations with limitations on different media component fluxes.

## Sheet: oleoyl-CoA
oleoyl-CoA max import rate (mmol/gDW/h)	host objective optimum	virus objective optimum	host %	virus %
0	0	0	0	0
0.1	0.170583	0.767245	9.58057	26.5549
0.2	0.341166	1.53449	19.1611	53.1097
0.3	0.51175	2.30173	28.7417	79.6646
0.4	0.682333	2.88928	38.3223	100
0.5	0.852916	2.88928	47.9028	100
0.6	1.0235	2.88928	57.4834	100
0.7	1.19408	2.88928	67.064	100
0.8	1.36467	2.88928	76.6446	100
0.9	1.53525	2.88928	86.2251	100
1	1.70583	2.88928	95.8057	100
2	1.78051	2.88928	100	100
3	1.78051	2.88928	100	100
4	1.78051	2.88928	100	100
5	1.78051	2.88928	100	100
6	1.78051	2.88928	100	100
7	1.78051	2.88928	100	100
8	1.78051	2.88928	100	100
9	1.78051	2.88928	100	100
10	1.78051	2.88928	100	100

## Sheet: carnosine
carnosine max import rate (mmol/gDW/h)	host objective optimum	virus objective optimum	host %	virus %
0	0	0	0	0
0.1	0.442038	0.990693	24.8265	34.2886
0.2	0.884077	1.98139	49.6529	68.5771
0.3	1.32611	2.67567	74.4794	92.6066
0.4	1.68805	2.6798	94.8069	92.7496
0.5	1.69065	2.68393	94.9531	92.8927
0.6	1.69325	2.68806	95.0993	93.0357
0.7	1.69586	2.6922	95.2455	93.1787
0.8	1.69846	2.69633	95.3917	93.3218
0.9	1.70106	2.70046	95.5379	93.4648
1	1.70367	2.70459	95.6841	93.6079
2	1.7297	2.74592	97.1462	95.0382
3	1.75573	2.78725	98.6083	96.4685
4	1.78051	2.82857	100	97.8989
5	1.78051	2.8699	100	99.3292
6	1.78051	2.88928	100	100
7	1.78051	2.88928	100	100
8	1.78051	2.88928	100	100
9	1.78051	2.88928	100	100
10	1.78051	2.88928	100	100

## Sheet: leucylleucine
leucylleucine max import rate (mmol/gDW/h)	host objective optimum	virus objective optimum	host %	virus %
0	0	0	0	0
0.1	0.228752	0.29915	12.8475	10.3538
0.2	0.457504	0.598301	25.6951	20.7076
0.3	0.686256	0.897451	38.5426	31.0614
0.4	0.915009	1.1966	51.3902	41.4152
0.5	1.14376	1.49575	64.2377	51.769
0.6	1.37251	1.7949	77.0853	62.1228
0.7	1.60126	2.09405	89.9328	72.4766
0.8	1.78051	2.3932	100	82.8304
0.9	1.78051	2.69235	100	93.1842
1	1.78051	2.88928	100	100
2	1.78051	2.88928	100	100
3	1.78051	2.88928	100	100
4	1.78051	2.88928	100	100
5	1.78051	2.88928	100	100
6	1.78051	2.88928	100	100
7	1.78051	2.88928	100	100
8	1.78051	2.88928	100	100
9	1.78051	2.88928	100	100
10	1.78051	2.88928	100	100

## Sheet: 3mob
3mob max import rate (mmol/gDW/h)	host objective optimum	virus objective optimum	host %	virus %
0	0	0	0	0
0.1	0.184577	0.284503	10.3665	9.84684
0.2	0.369154	0.569006	20.733	19.6937
0.3	0.55373	0.853509	31.0995	29.5405
0.4	0.738307	1.13801	41.466	39.3874
0.5	0.922884	1.42252	51.8325	49.2342
0.6	1.10746	1.70702	62.199	59.0811
0.7	1.29204	1.99152	72.5655	68.9279
0.8	1.47661	2.27602	82.932	78.7747
0.9	1.66119	2.56053	93.2985	88.6216
1	1.77693	2.84503	99.7991	98.4684
2	1.77891	2.88928	99.9101	100
3	1.78051	2.88928	100	100
4	1.78051	2.88928	100	100
5	1.78051	2.88928	100	100
6	1.78051	2.88928	100	100
7	1.78051	2.88928	100	100
8	1.78051	2.88928	100	100
9	1.78051	2.88928	100	100
10	1.78051	2.88928	100	100

## Sheet: ahcys
ahcys max import rate (mmol/gDW/h)	host objective optimum	virus objective optimum	host %	virus %
0	0	0	0	0
0.1	0.257783	0.453694	14.478	15.7027
0.2	0.515566	0.907389	28.9561	31.4053
0.3	0.773349	1.36108	43.4341	47.108
0.4	1.03113	1.81478	57.9121	62.8107
0.5	1.28892	2.26847	72.3902	78.5134
0.6	1.44909	2.35148	81.3861	81.3861
0.7	1.45262	2.3572	81.5842	81.5842
0.8	1.45614	2.36292	81.7822	81.7822
0.9	1.45967	2.36864	81.9802	81.9802
1	1.46319	2.37436	82.1782	82.1782
2	1.49845	2.43157	84.1584	84.1584
3	1.53371	2.48879	86.1386	86.1386
4	1.56897	2.546	88.1188	88.1188
5	1.60422	2.60321	90.099	90.099
6	1.63948	2.66043	92.0792	92.0792
7	1.67474	2.71764	94.0594	94.0594
8	1.71	2.77486	96.0396	96.0396
9	1.74525	2.83207	98.0198	98.0198
10	1.78051	2.88928	100	100

## Sheet: glyphe
glyphe max import rate (mmol/gDW/h)	host objective optimum	virus objective optimum	host %	virus %
0	0	0	0	0
0.1	0.178421	0.182512	10.0208	6.31685
0.2	0.356843	0.365023	20.0416	12.6337
0.3	0.535264	0.547535	30.0624	18.9506
0.4	0.713685	0.730047	40.0831	25.2674
0.5	0.892107	0.912559	50.1039	31.5843
0.6	1.07053	1.09507	60.1247	37.9011
0.7	1.24895	1.27758	70.1455	44.218
0.8	1.42737	1.46009	80.1663	50.5348
0.9	1.60579	1.64261	90.1871	56.8517
1	1.75671	1.82512	98.6634	63.1685
2	1.75936	2.85495	98.8119	98.8119
3	1.762	2.85924	98.9604	98.9604
4	1.76465	2.86354	99.1089	99.1089
5	1.76729	2.86783	99.2574	99.2574
6	1.76993	2.87212	99.4059	99.4059
7	1.77258	2.87641	99.5545	99.5545
8	1.77522	2.8807	99.703	99.703
9	1.77787	2.88499	99.8515	99.8515
10	1.78051	2.88928	100	100

## Sheet: threonine
threonine max import rate (mmol/gDW/h)	host objective optimum	virus objective optimum	host %	virus %
0	0	0	0	0
0.1	0.209014	0.230037	11.739	7.96173
0.2	0.418027	0.460074	23.4779	15.9235
0.3	0.627041	0.690111	35.2169	23.8852
0.4	0.836054	0.920148	46.9558	31.8469
0.5	1.04507	1.15018	58.6948	39.8087
0.6	1.25408	1.38022	70.4338	47.7704
0.7	1.4631	1.61026	82.1727	55.7321
0.8	1.67211	1.8403	93.9117	63.6939
0.9	1.76246	2.07033	98.9864	71.6556
1	1.76266	2.30037	98.9975	79.6173
2	1.76465	2.86354	99.1089	99.1089
3	1.76663	2.86675	99.2203	99.2203
4	1.76861	2.86997	99.3317	99.3317
5	1.7706	2.87319	99.4431	99.4431
6	1.77258	2.87641	99.5545	99.5545
7	1.77456	2.87963	99.6658	99.6658
8	1.77655	2.88285	99.7772	99.7772
9	1.77853	2.88606	99.8886	99.8886
10	1.78051	2.88928	100	100

## Sheet: biocyt
biocyt max import rate (mmol/gDW/h)	host objective optimum	virus objective optimum	host %	virus %
0	0	0	0	0
0.1	0.185503	0.331555	10.4185	11.4754
0.2	0.371005	0.663111	20.837	22.9507
0.3	0.556508	0.994666	31.2555	34.4261
0.4	0.742011	1.32622	41.674	45.9014
0.5	0.927513	1.65778	52.0925	57.3768
0.6	1.11302	1.98933	62.511	68.8521
0.7	1.29852	2.32089	72.9295	80.3275
0.8	1.48402	2.65244	83.348	91.8028
0.9	1.66952	2.88928	93.7665	100
1	1.78051	2.88928	100	100
2	1.78051	2.88928	100	100
3	1.78051	2.88928	100	100
4	1.78051	2.88928	100	100
5	1.78051	2.88928	100	100
6	1.78051	2.88928	100	100
7	1.78051	2.88928	100	100
8	1.78051	2.88928	100	100
9	1.78051	2.88928	100	100
10	1.78051	2.88928	100	100

[truncated: 5 more sheets: 3mop, tryptophane, O2, NH4, glucose]
